# Supplementary material
Source: PubMed Central journal article supplement (PMC3800136)

## Supporting Information for:

**One-Pot Anti-Markovnikov Hydroamination of Unactivated Alkenes by  
Hydrozirconation and Amination**

Alexandra E. Strom and John F. Hartwig\*

*Department of Chemistry, University of California, Berkeley, California 94720, United States*

| <b>Table of Contents</b>                                                                        | <b>Page</b> |
|-------------------------------------------------------------------------------------------------|-------------|
| <i>N</i> -methylhydroxylamine- <i>O</i> -sulfonic acid.....                                     | S3          |
| <i>N</i> -isopropylhydroxylamine- <i>O</i> -sulfonic acid.....                                  | S4          |
| <i>N</i> -(3-phenylpropyl)hydroxylamine- <i>O</i> -sulfonic acid.....                           | S5          |
| <i>N</i> -(heptyl)hydroxylamine- <i>O</i> -sulfonic acid.....                                   | S6          |
| <i>N</i> -( <i>tert</i> -butoxy carbonyl)-(2,2-diphenyl-hept-6-enyl)-7-methylamine.....         | S7          |
| <i>N</i> -(3-phenylpropyl)octylamine.....                                                       | S8          |
| <i>N</i> -( <i>tert</i> -butoxy carbonyl)-(2,2-diphenyl-heptyl)-7-methylamino)-methylamine..... | S9          |
| 9- <i>O</i> -benzyl-10,11-dihydro-11-methylamino-quinine.....                                   | S10         |
| 2-(3-methylaminopropyl)phenyl-2,3,4,6-tetra- <i>O</i> -benzyl- $\alpha$ -D-mannopyranoside....  | S11         |
| (3,3-dimethyl)butylmethylamine.....                                                             | S12         |
| (6-chloro)hexylmethylamine.....                                                                 | S13         |
| <i>N</i> -methyl octylamine.....                                                                | S14         |
| <i>N</i> -methyl(3-trimethylsilyl)propylamine.....                                              | S15         |
| <i>N</i> -methyl(3-phenyl)propylamine.....                                                      | S16         |
| <i>N</i> -(2-cyclohexyl)ethyl methylamine.....                                                  | S17         |
| <i>N</i> -methyl(2-phenyl)propylamine. ....                                                     | S18         |
| 1-octylamine.....                                                                               | S19         |
| (2-phenyl)propylamine.....                                                                      | S20         |
| <i>N</i> -methyl- <i>exo</i> -2-norbornylamine.....                                             | S21         |

|                                                        |     |
|--------------------------------------------------------|-----|
| 3,4-dimethoxy- <i>N</i> -methylphenethylamine.....     | S22 |
| 3-trifluoromethyl- <i>N</i> -methylphenethylamine..... | S23 |
| (2-cyclohexyl)ethylamine.....                          | S24 |
| <i>N</i> ,2-dimethyloctan-1-amine.....                 | S25 |
| <i>N</i> -heptyloctan-1-amine.....                     | S26 |

*N*-methylhydroxylamine-*O*-sulfonic acid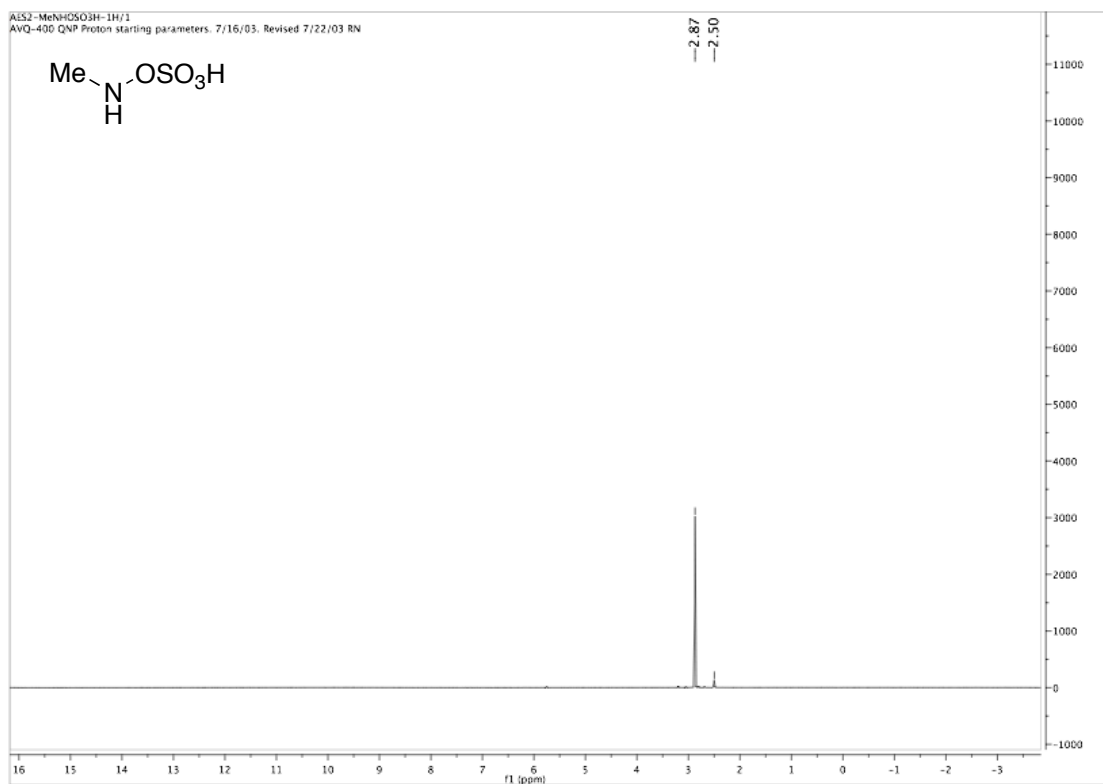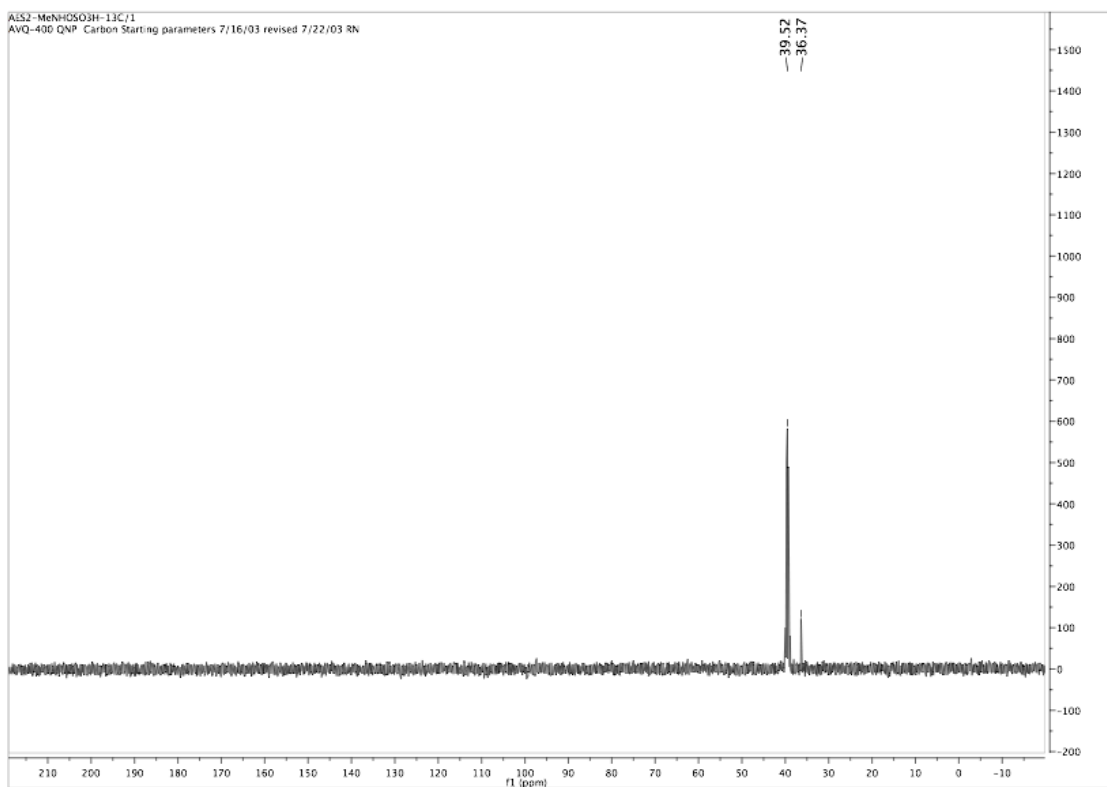

*N*-isopropylhydroxylamine-O-sulfonic acid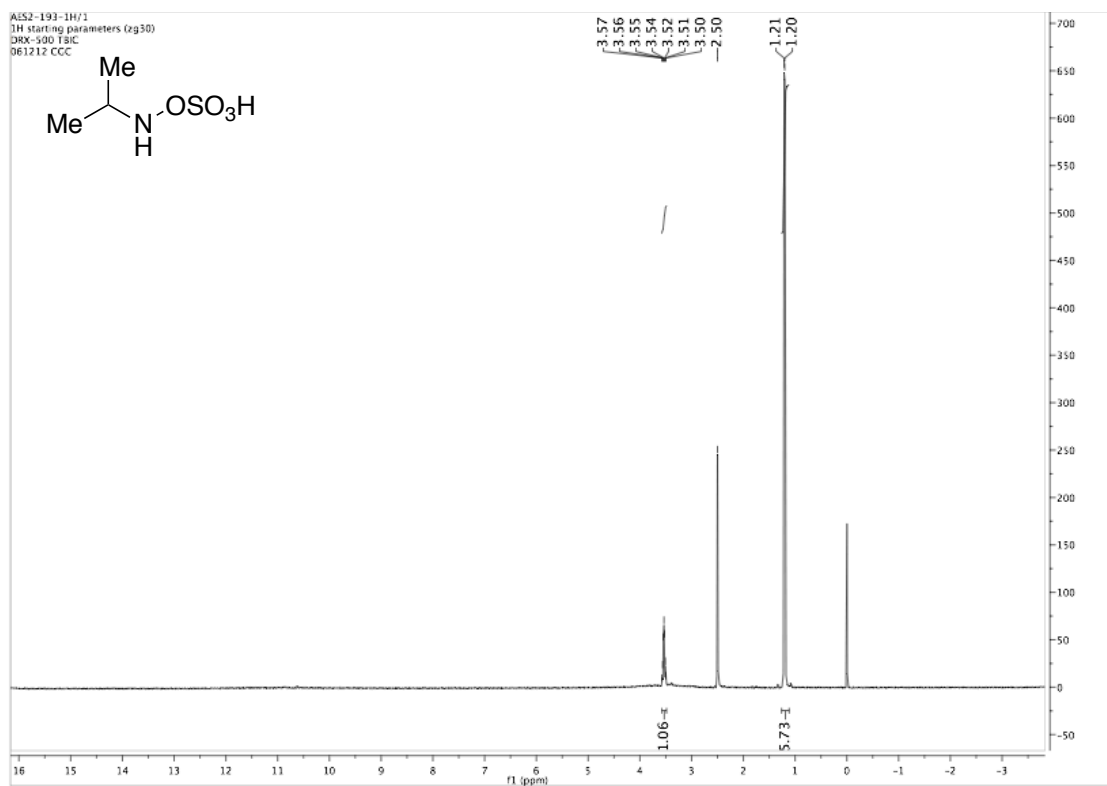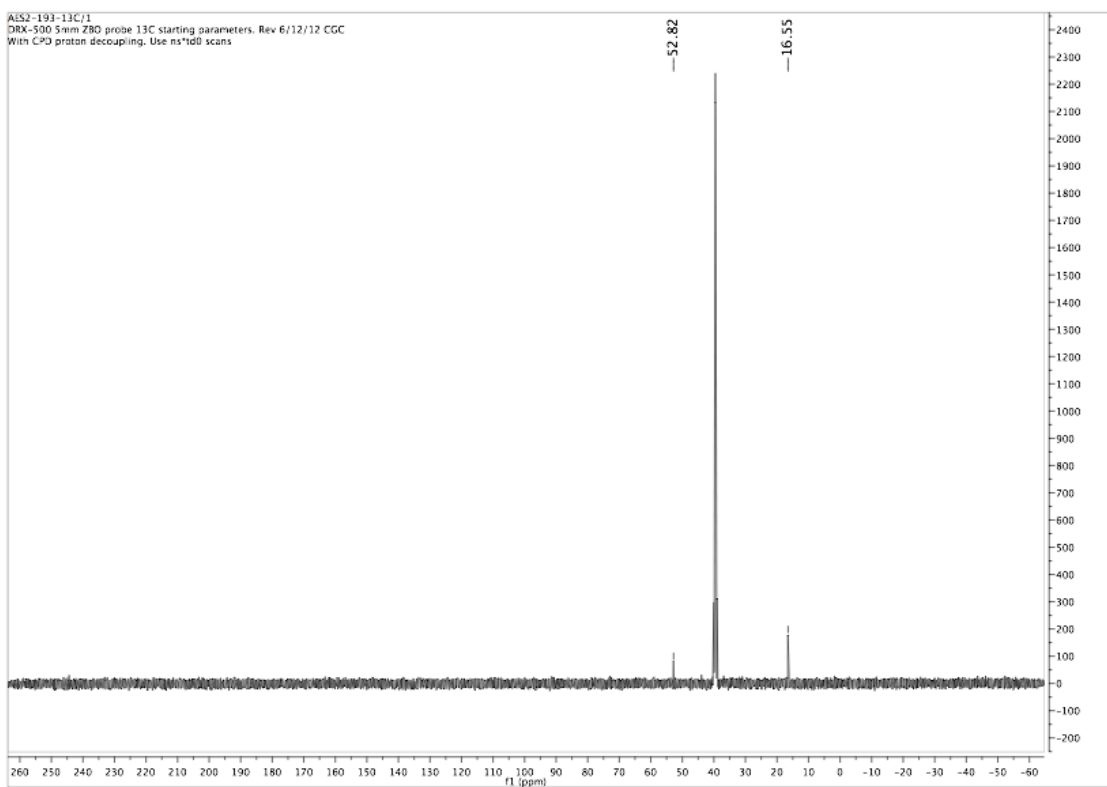

*N*-(3-phenylpropyl)hydroxylamine-*O*-sulfonic acid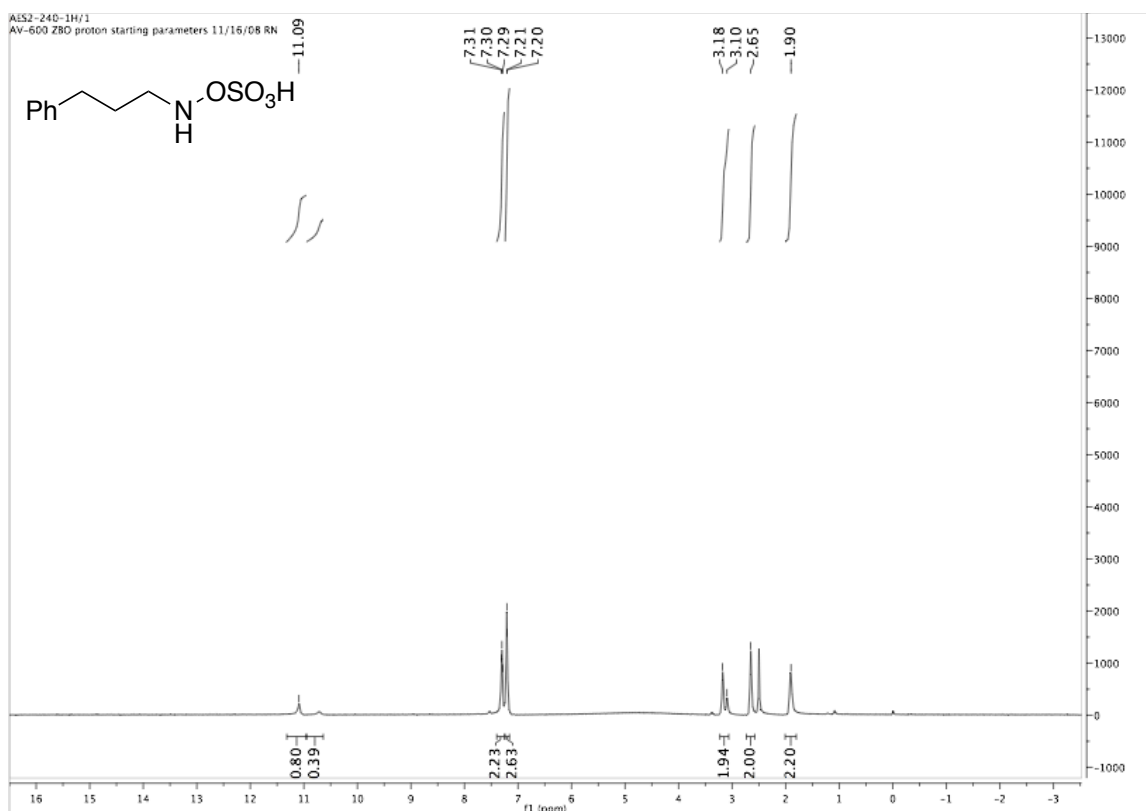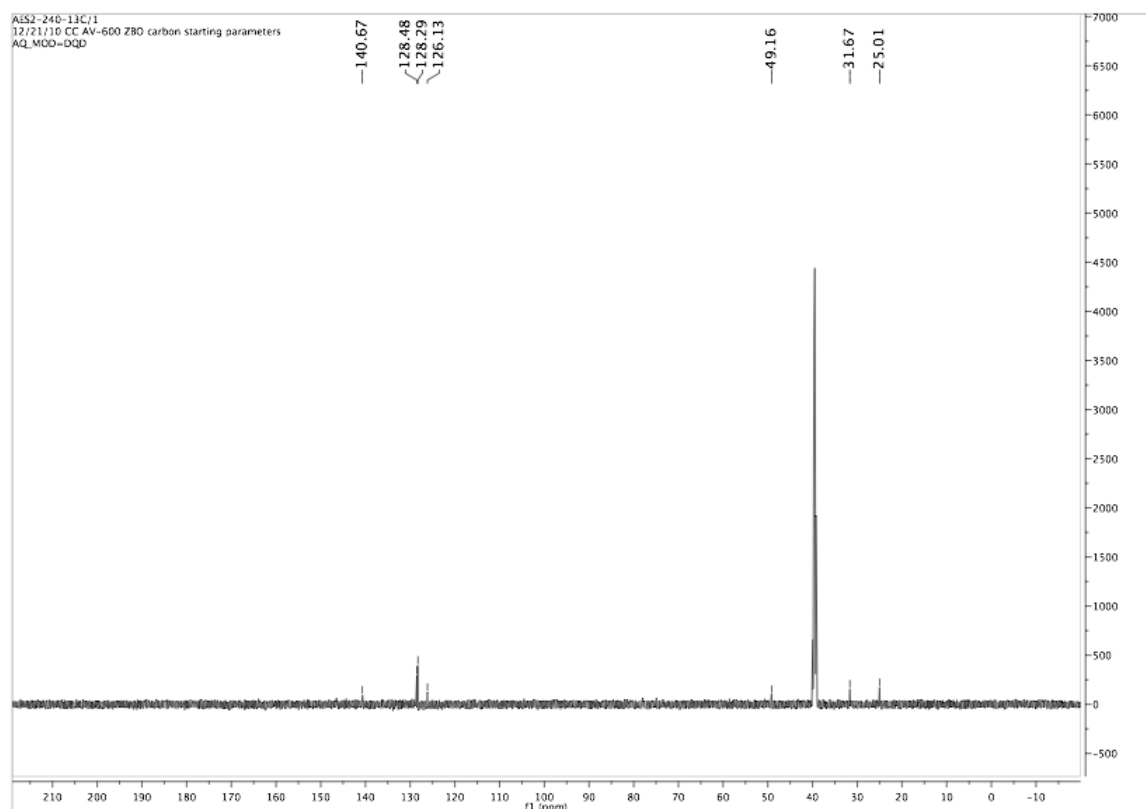

*N*-(heptyl)hydroxylamine-*O*-sulfonic acid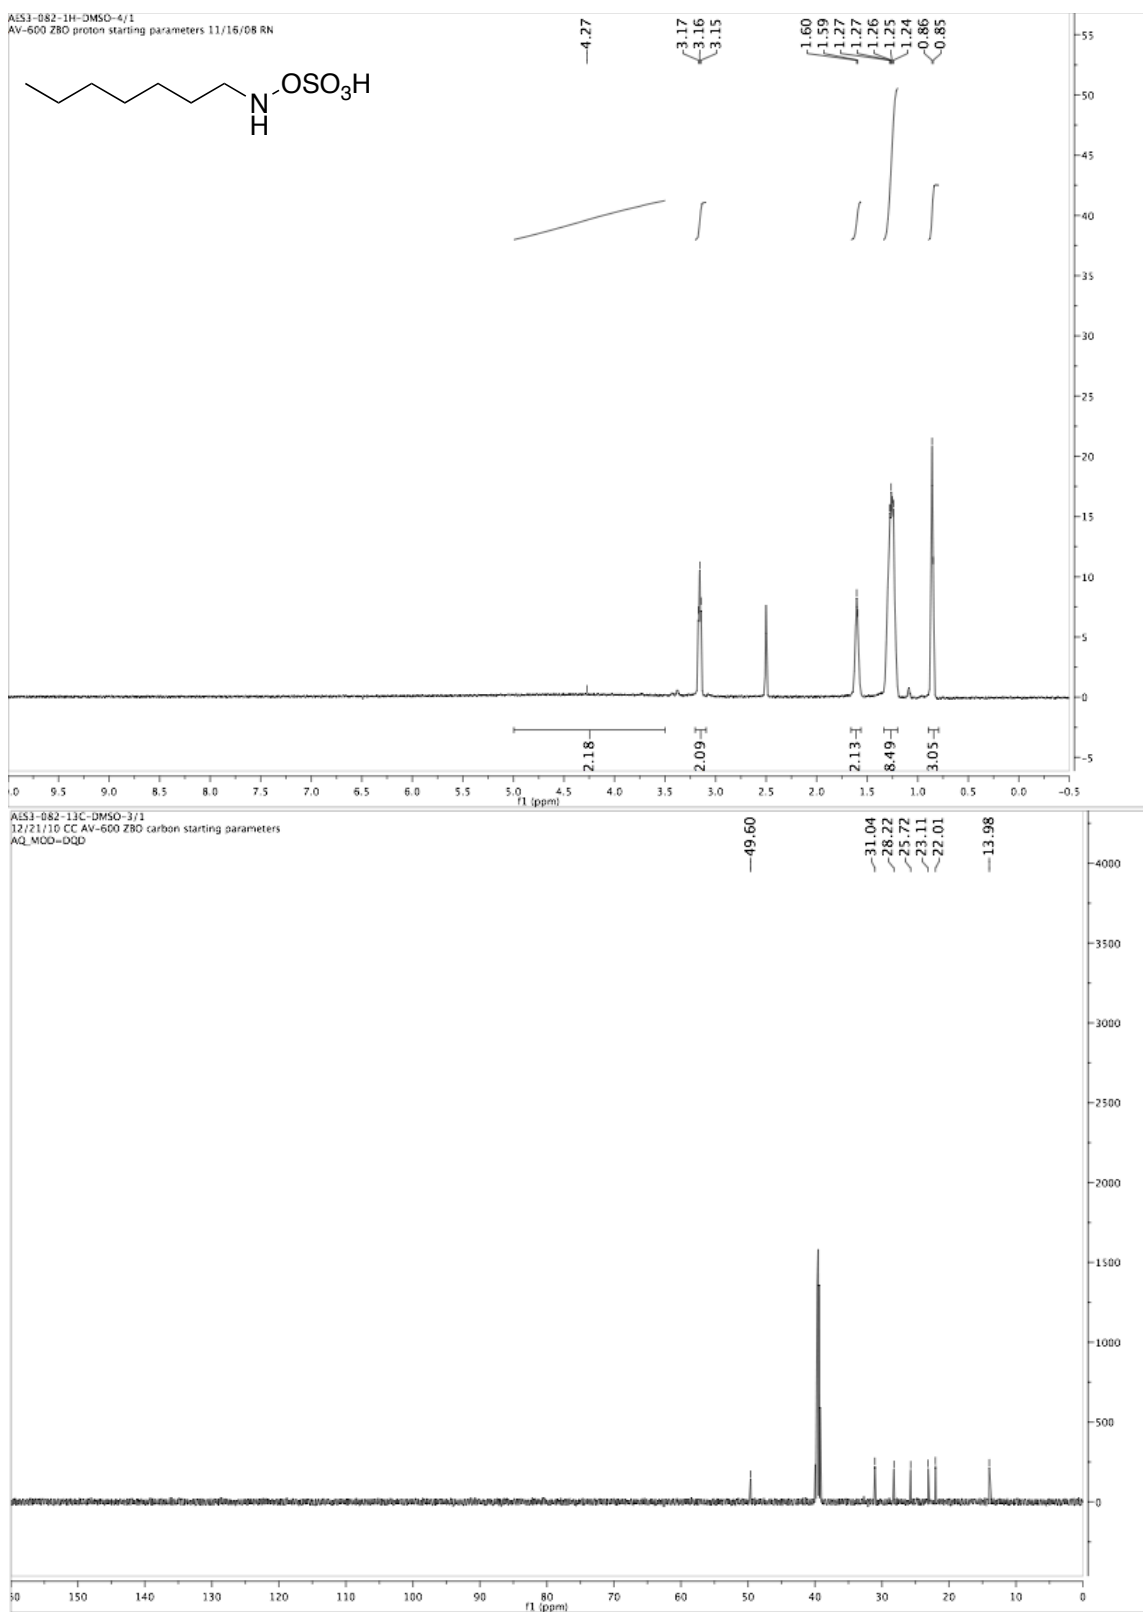

*N*-(*tert*-butoxy carbonyl)-(2,2-diphenyl-hept-6-enyl)-7-methylamine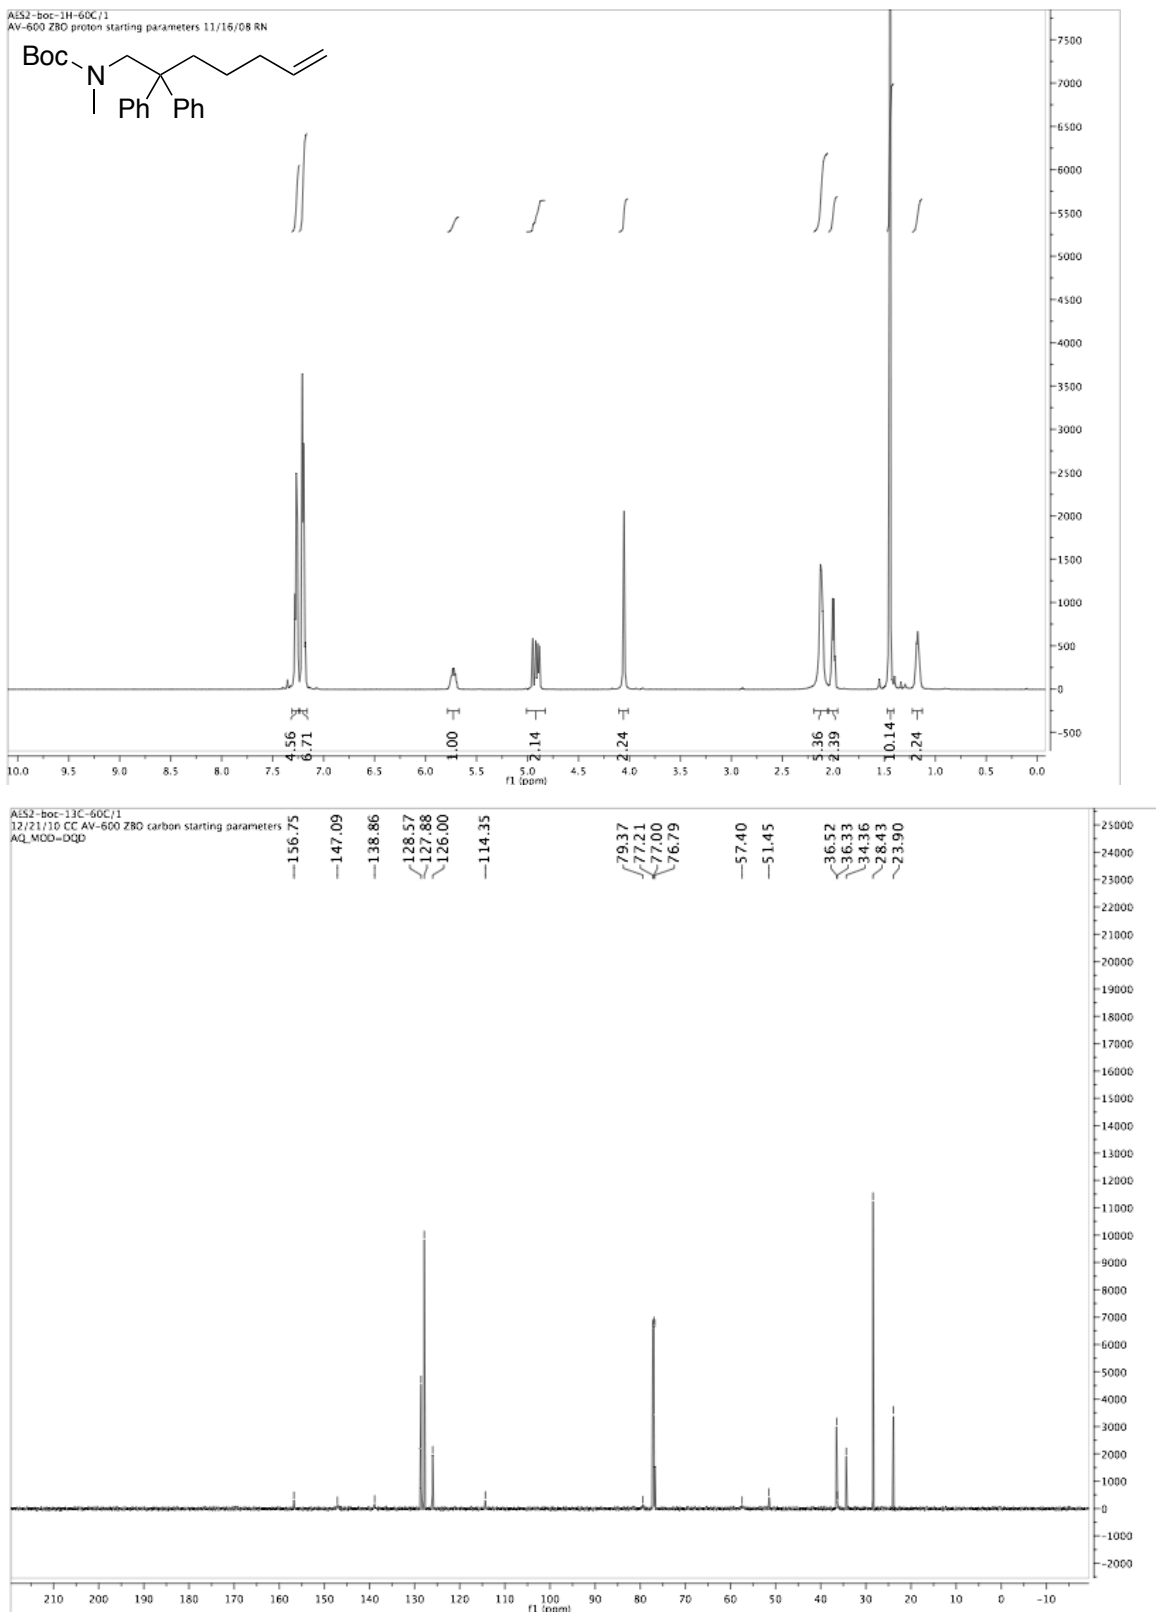

*N*-(3-phenylpropyl)octylamine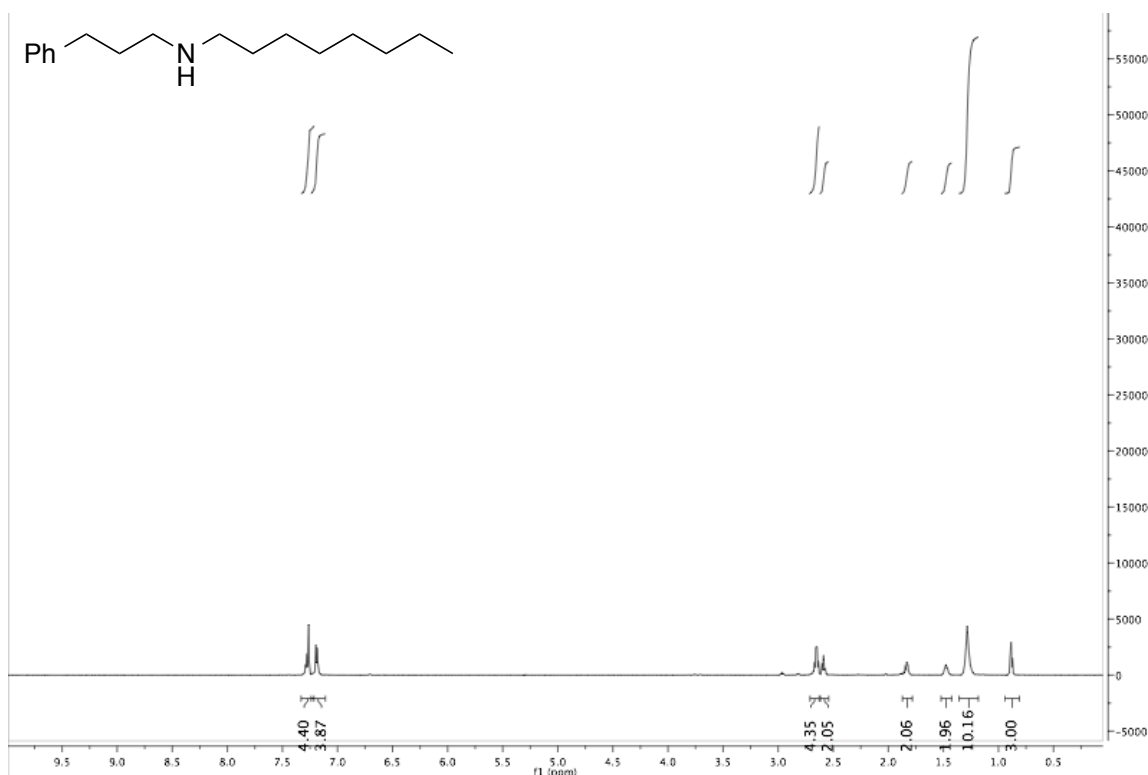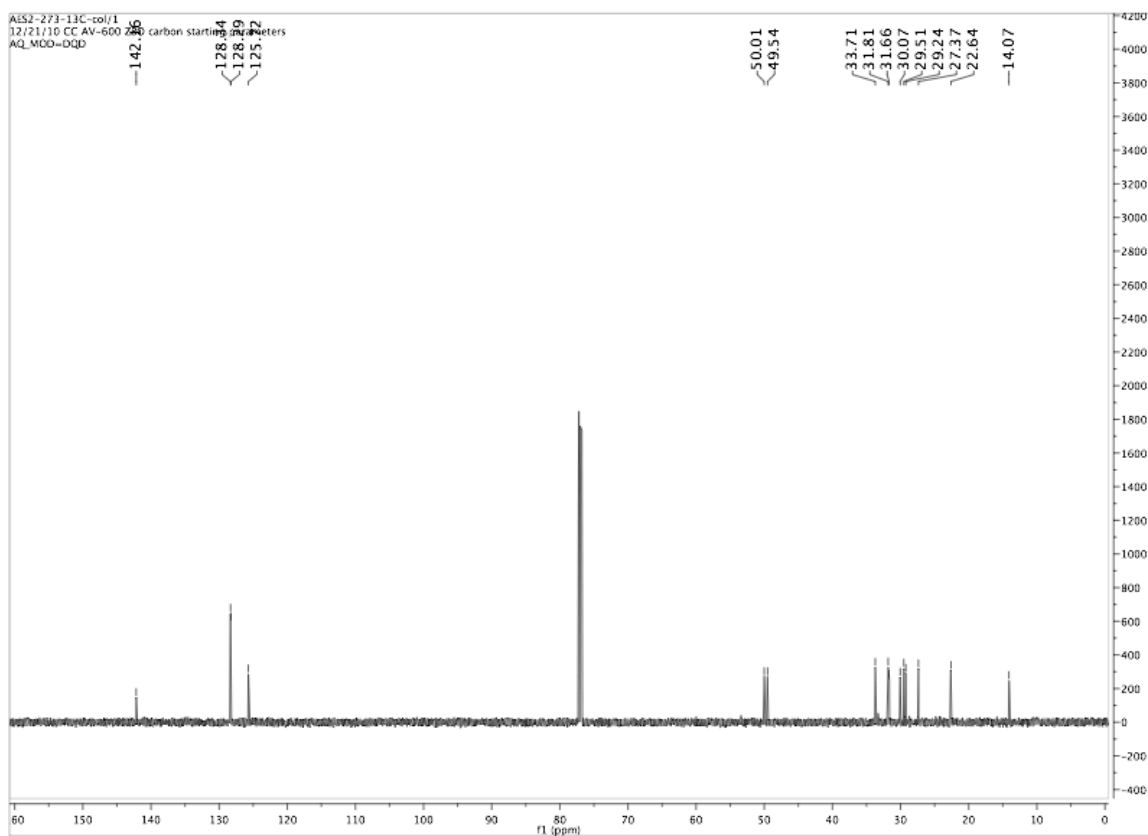



*N*-(*tert*-butoxy carbonyl)-(2,2-diphenyl-heptyl)-7-methylamino)-methylamine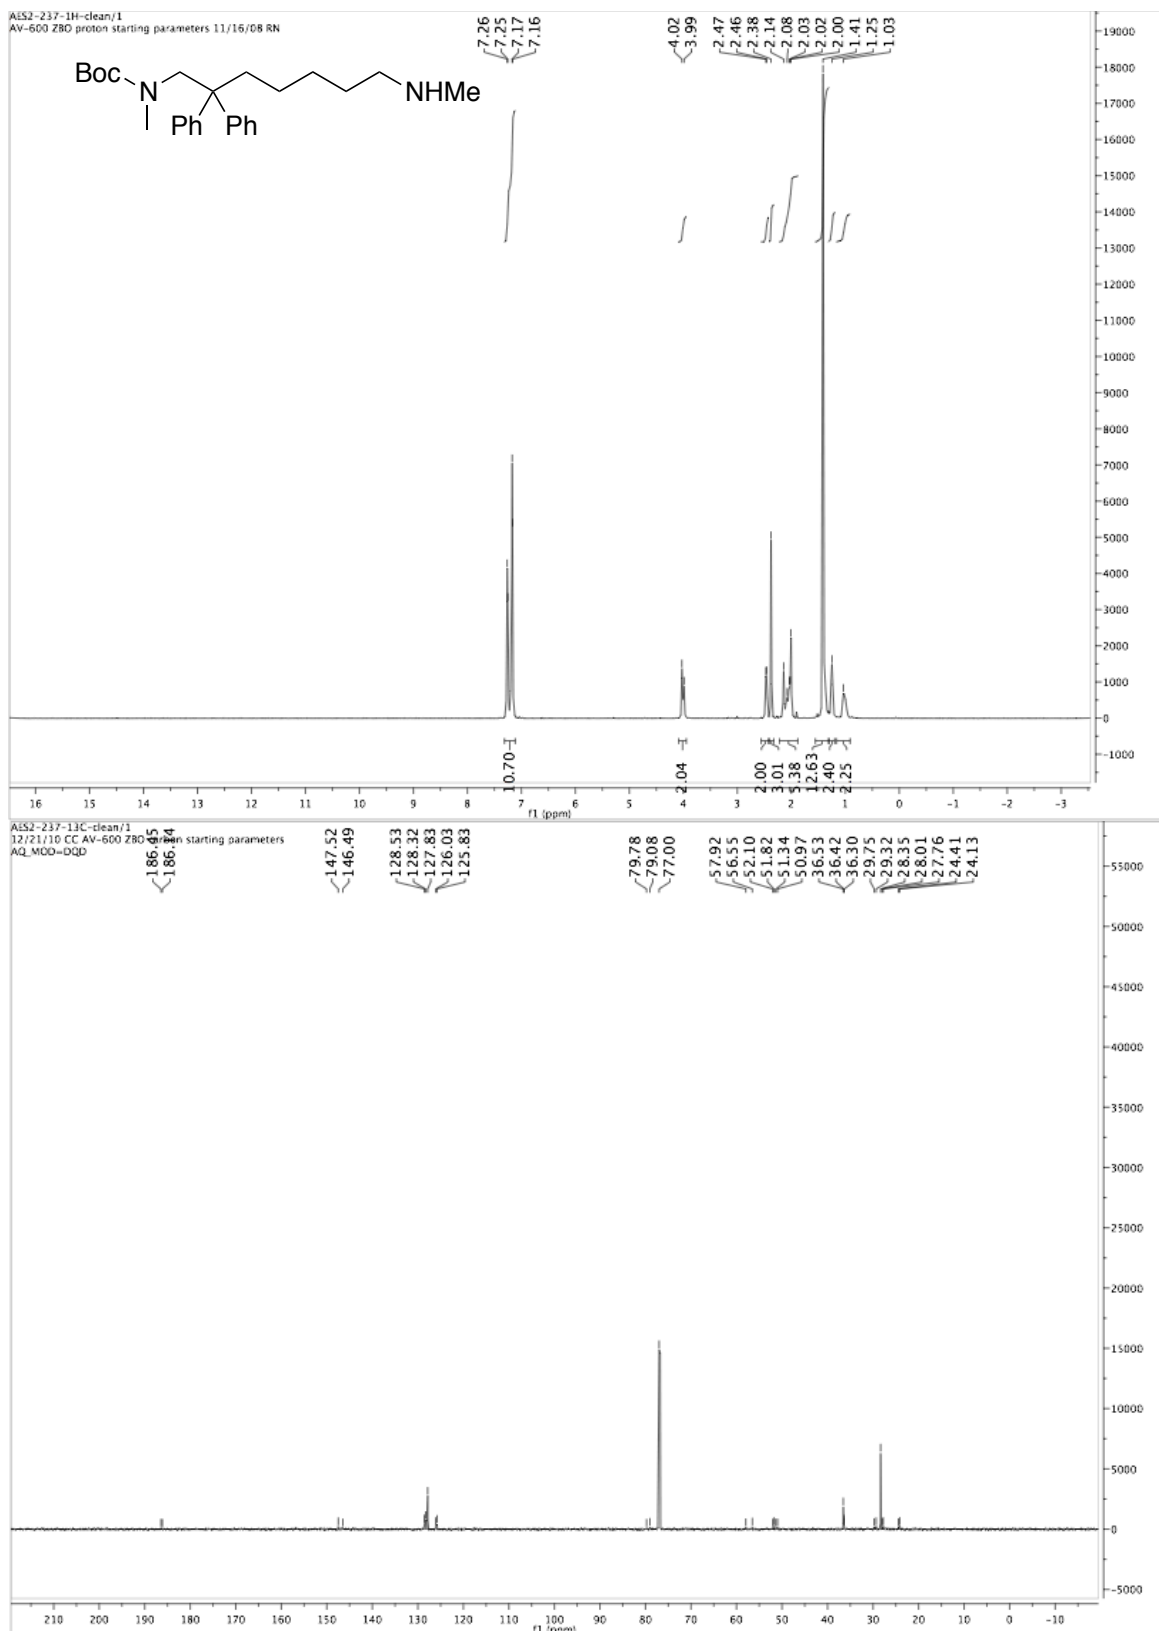

9-*O*-benzyl-10,11-dihydro-11-methylamino-quinine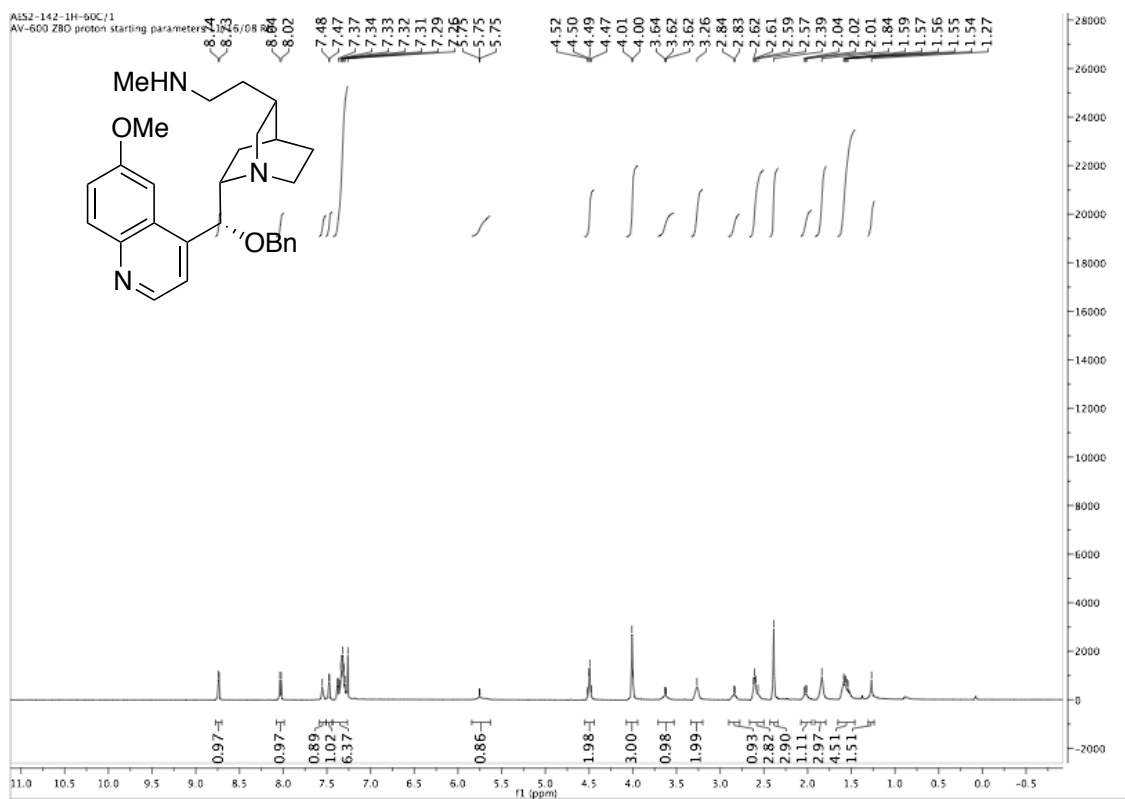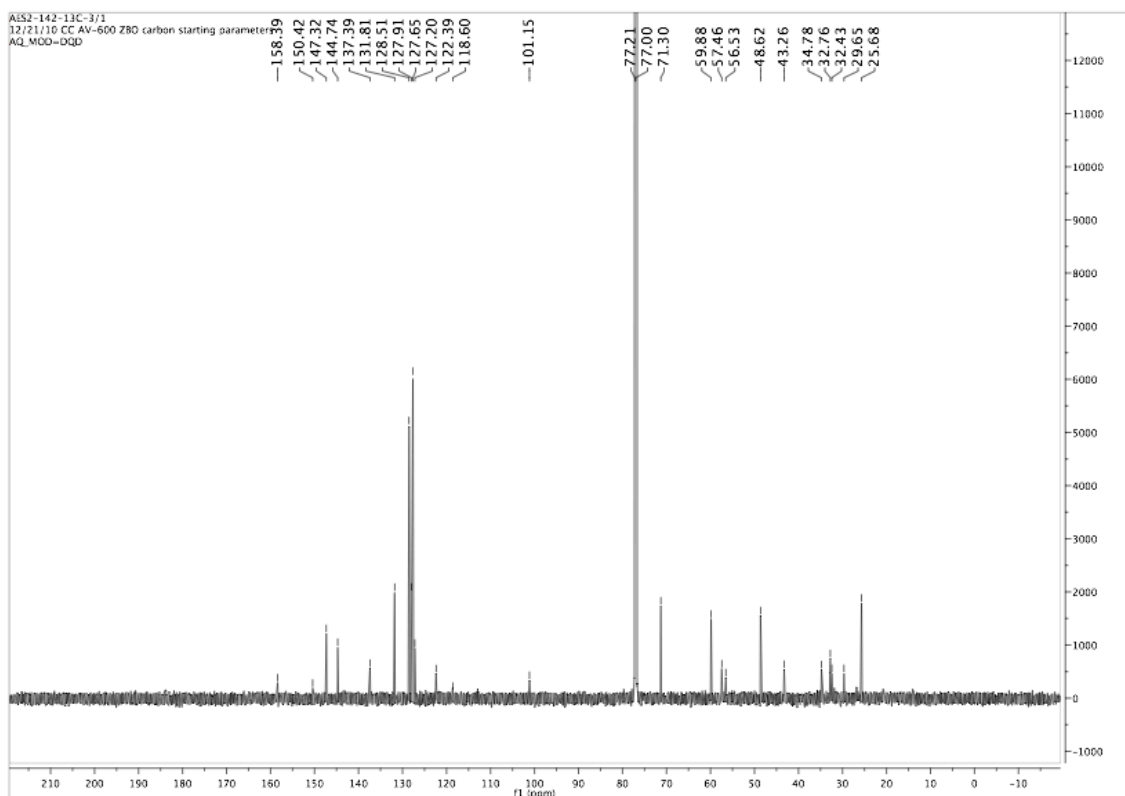

2-(3-methylaminopropyl)phenyl-2,3,4,6-tetra-*O*-benzyl- $\alpha$ -D-mannopyranoside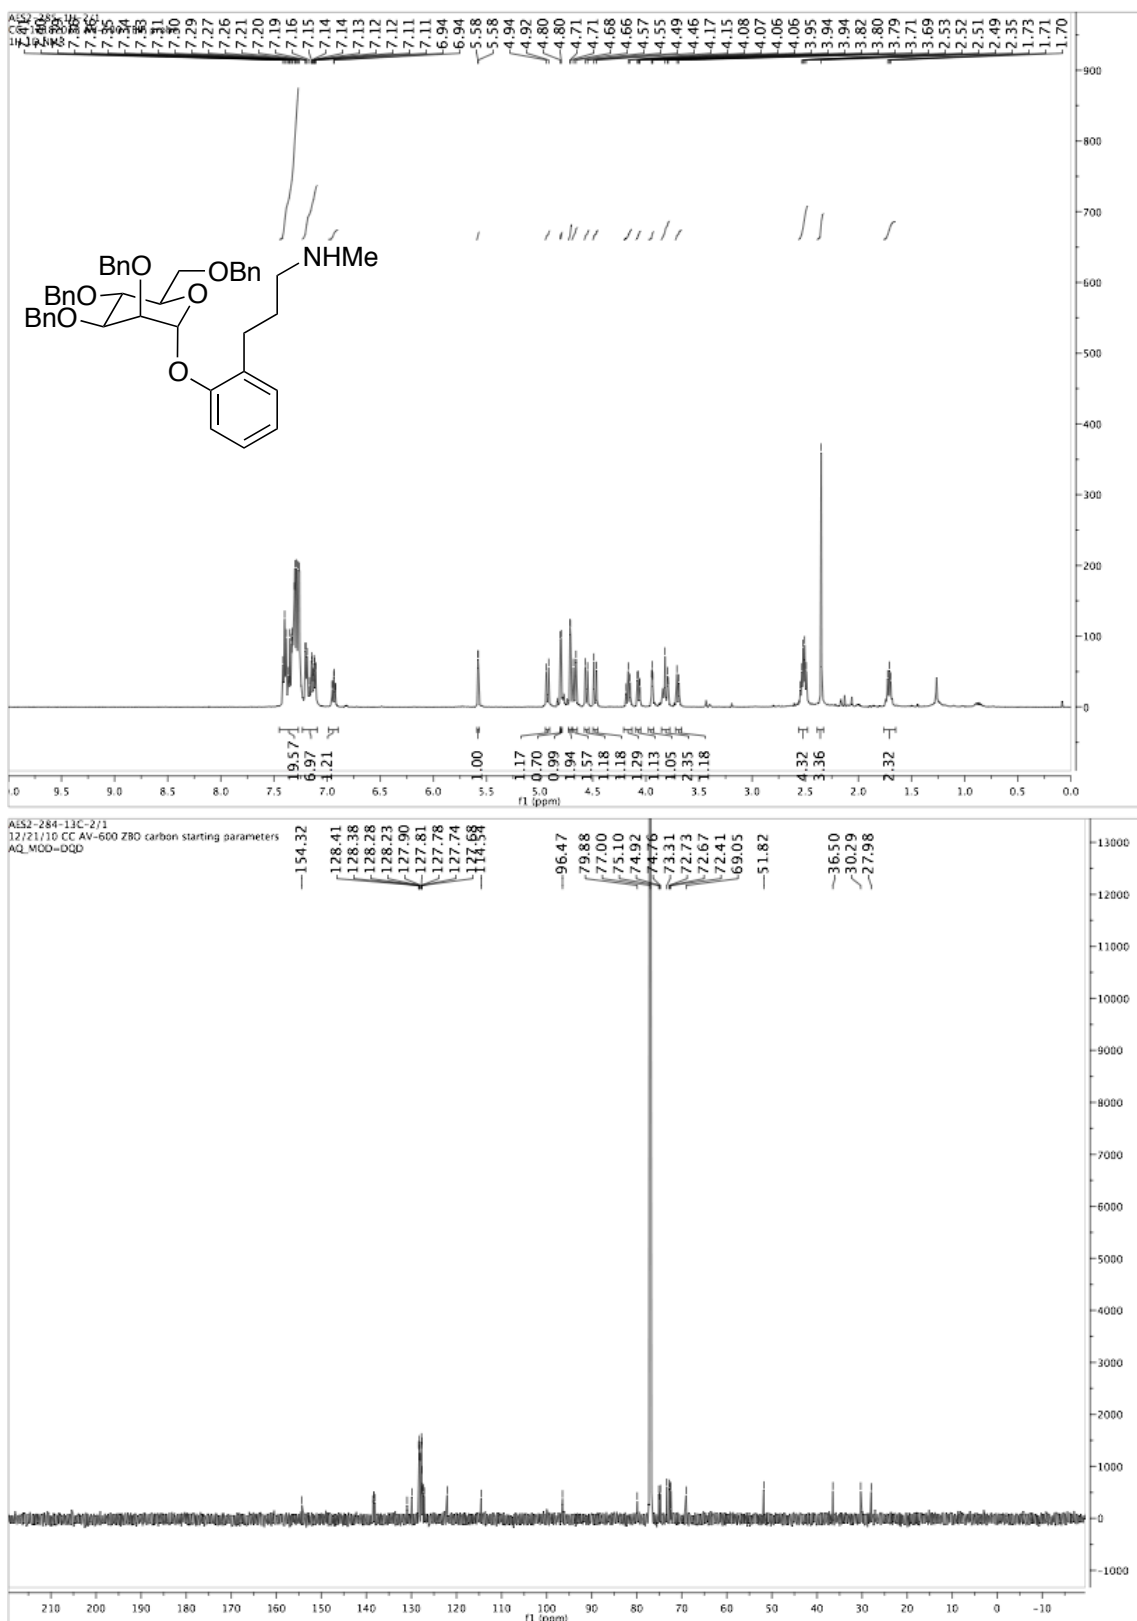

## (3,3-dimethyl)butylmethylamine

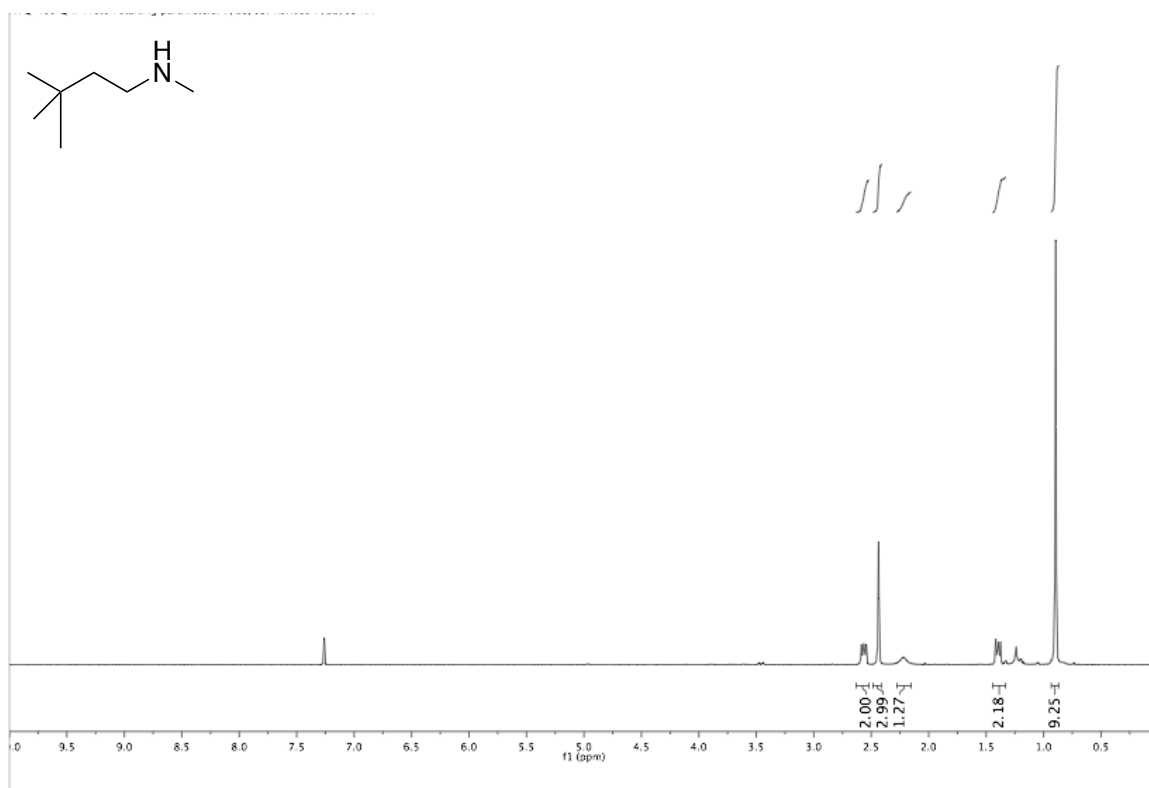

AES2-076-13C/1  
AVQ-400 QNP Carbon Starting parameters 7/16/03 revised 7/22/03 RN

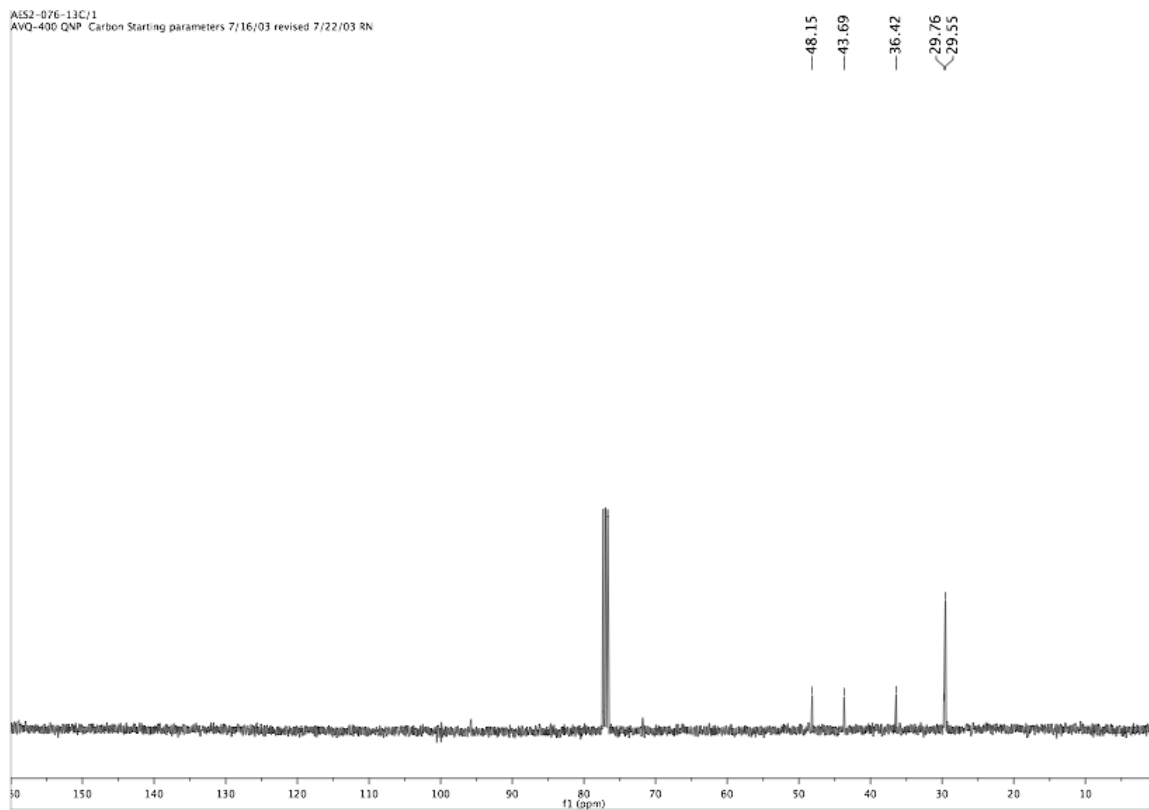

## (6-chloro)hexylmethylamine

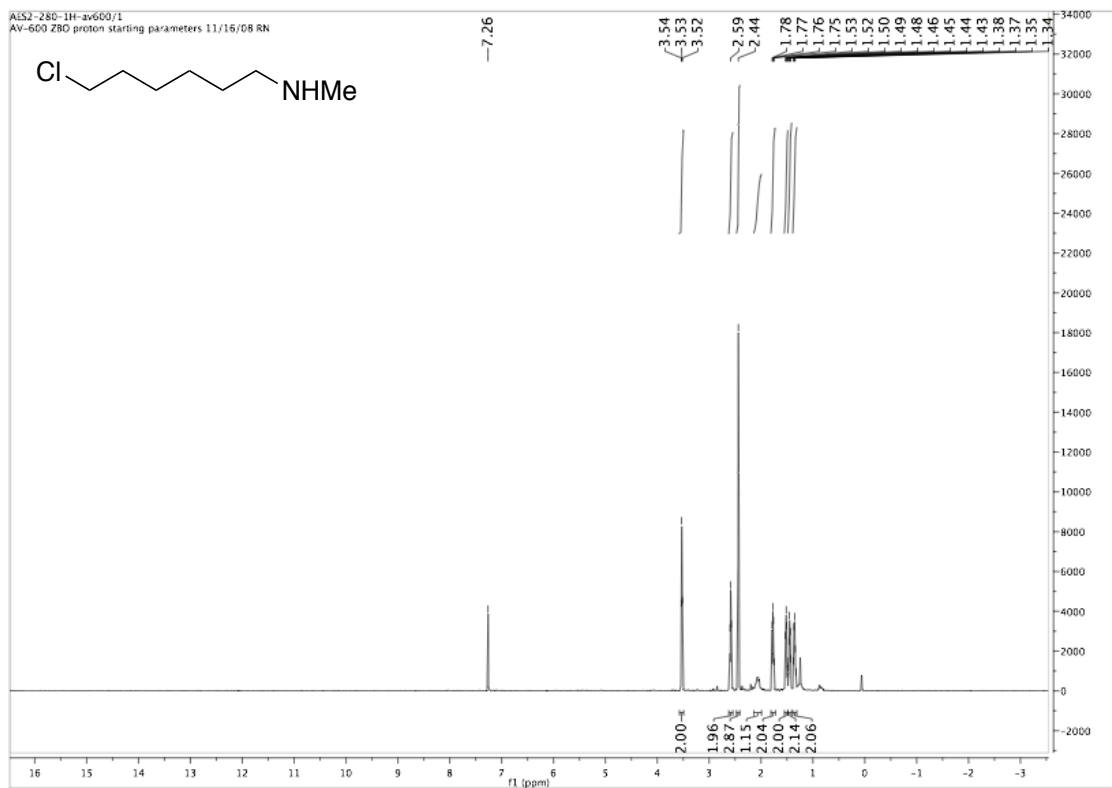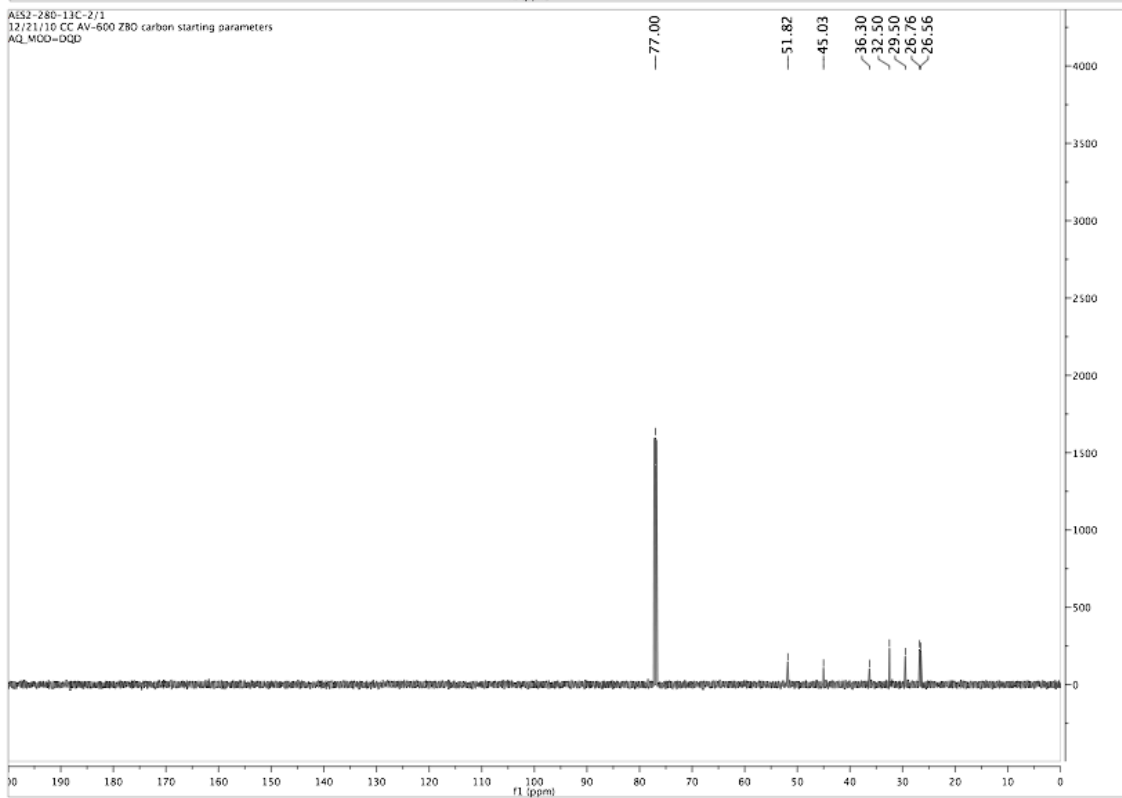

*N*-methyl octylamine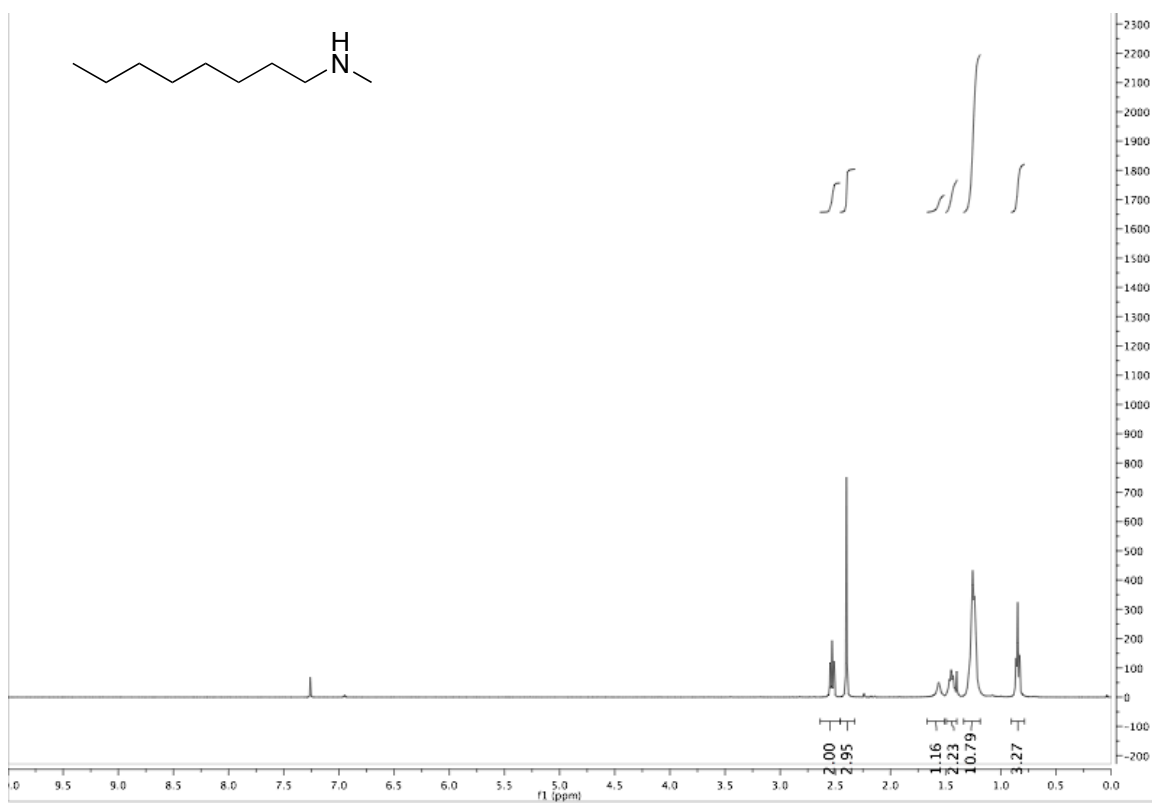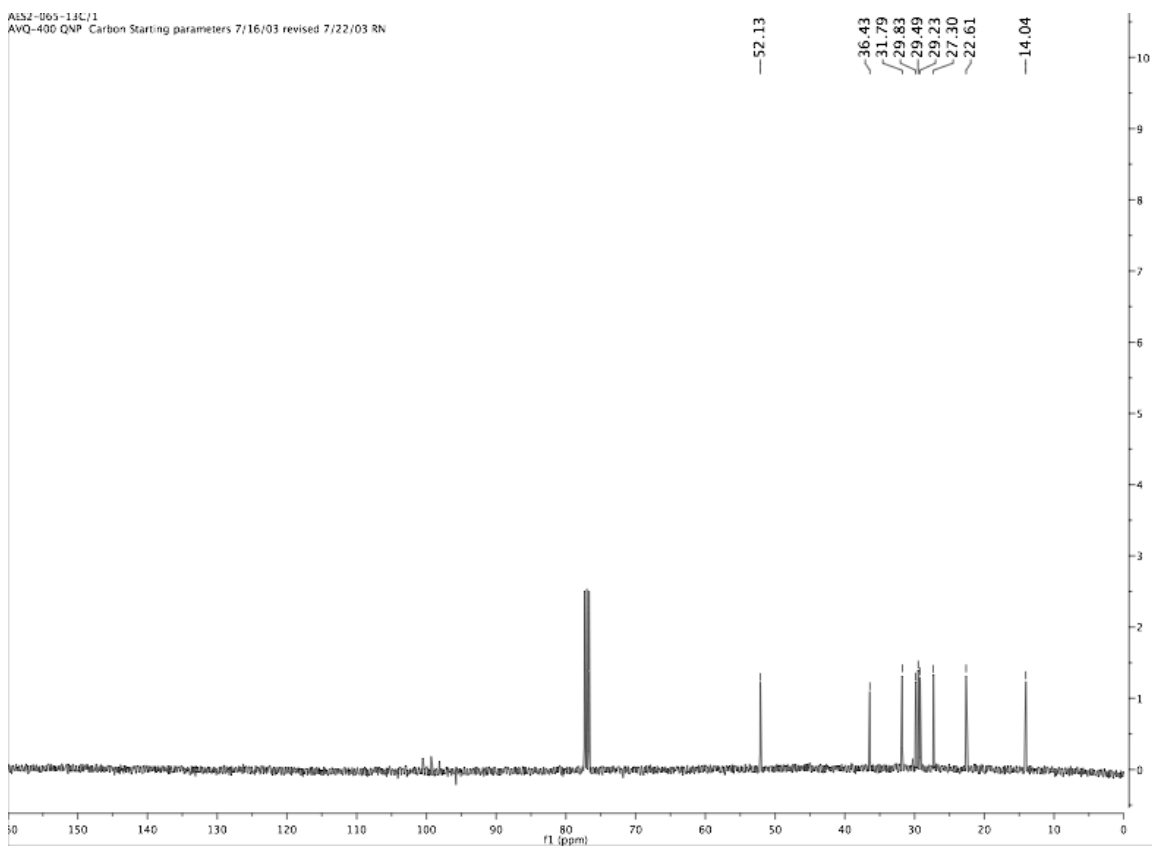

*N*-methyl(3-trimethylsilyl)propylamine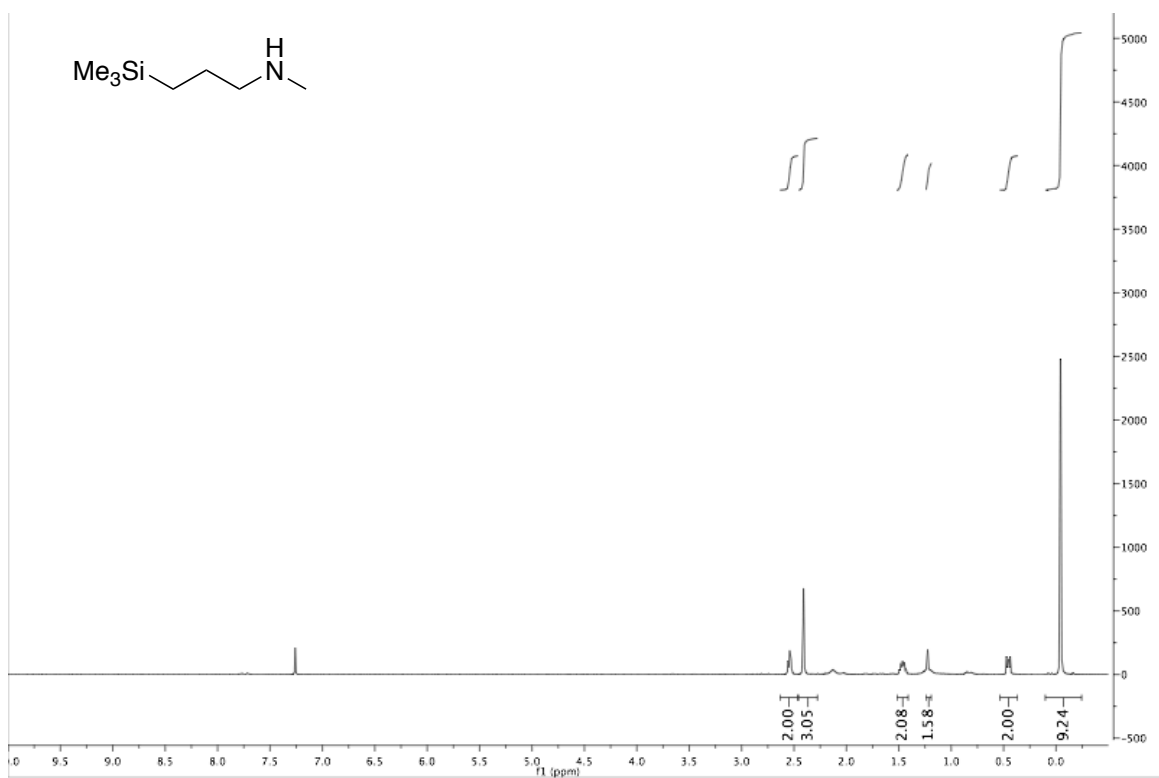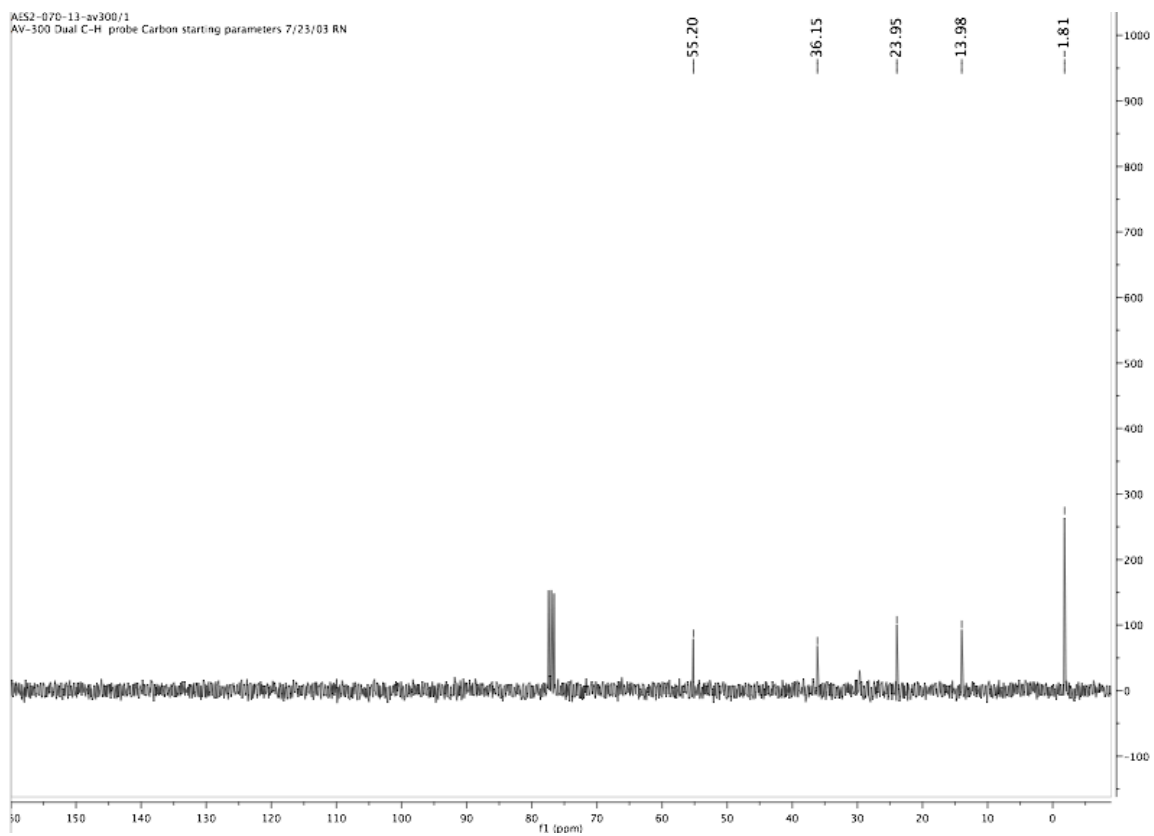

*N*-methyl(3-phenyl)propylamine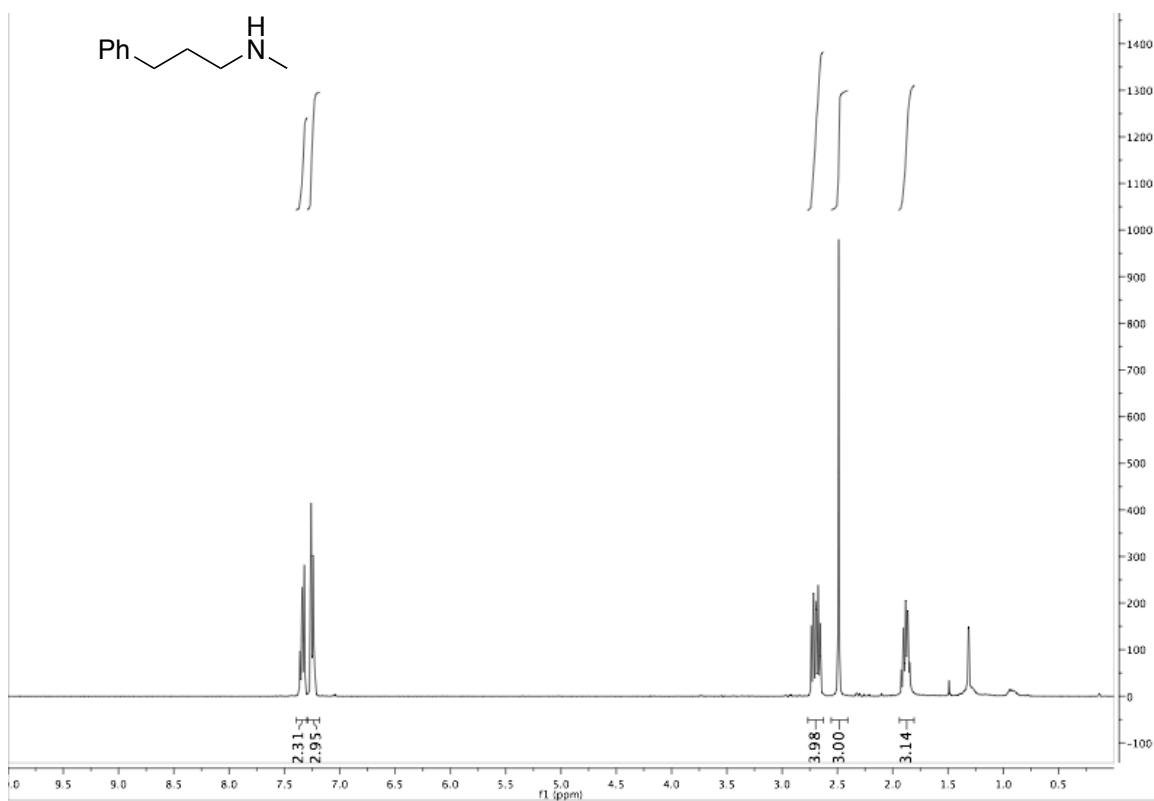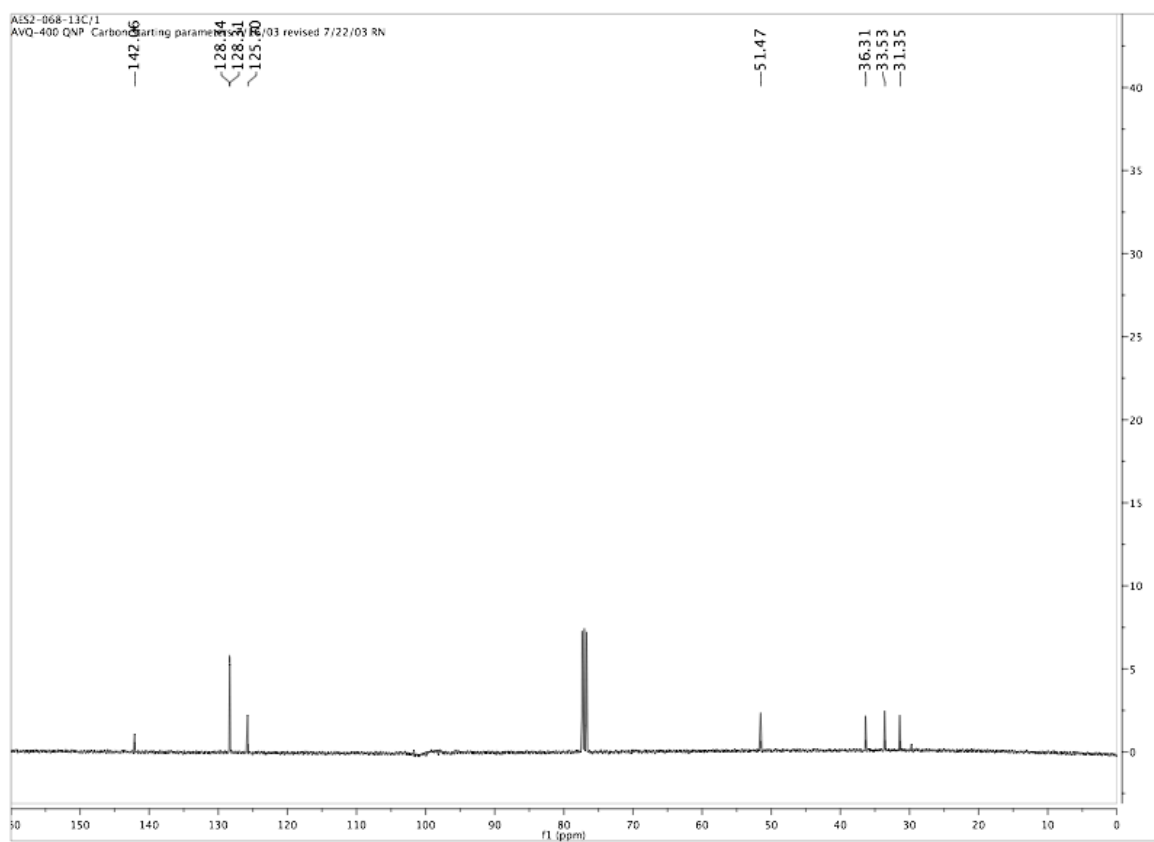



*N*-(2-cyclohexyl)ethyl methylamine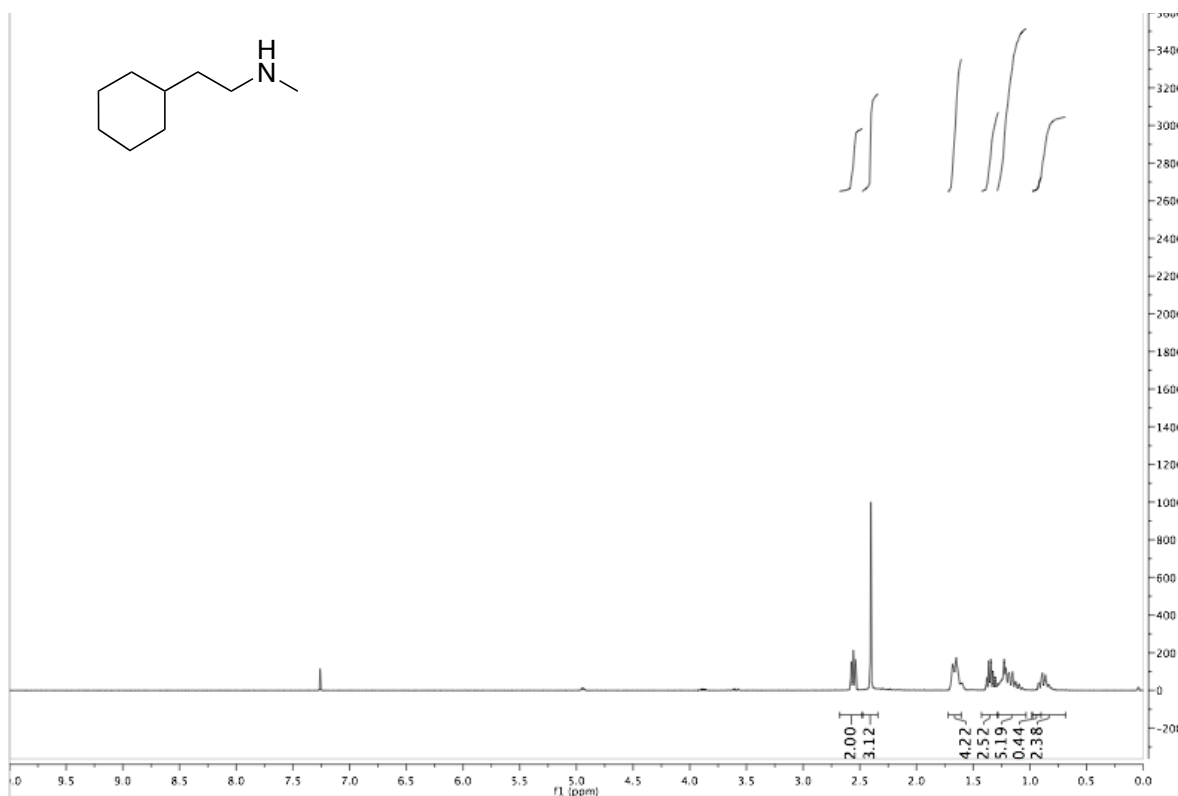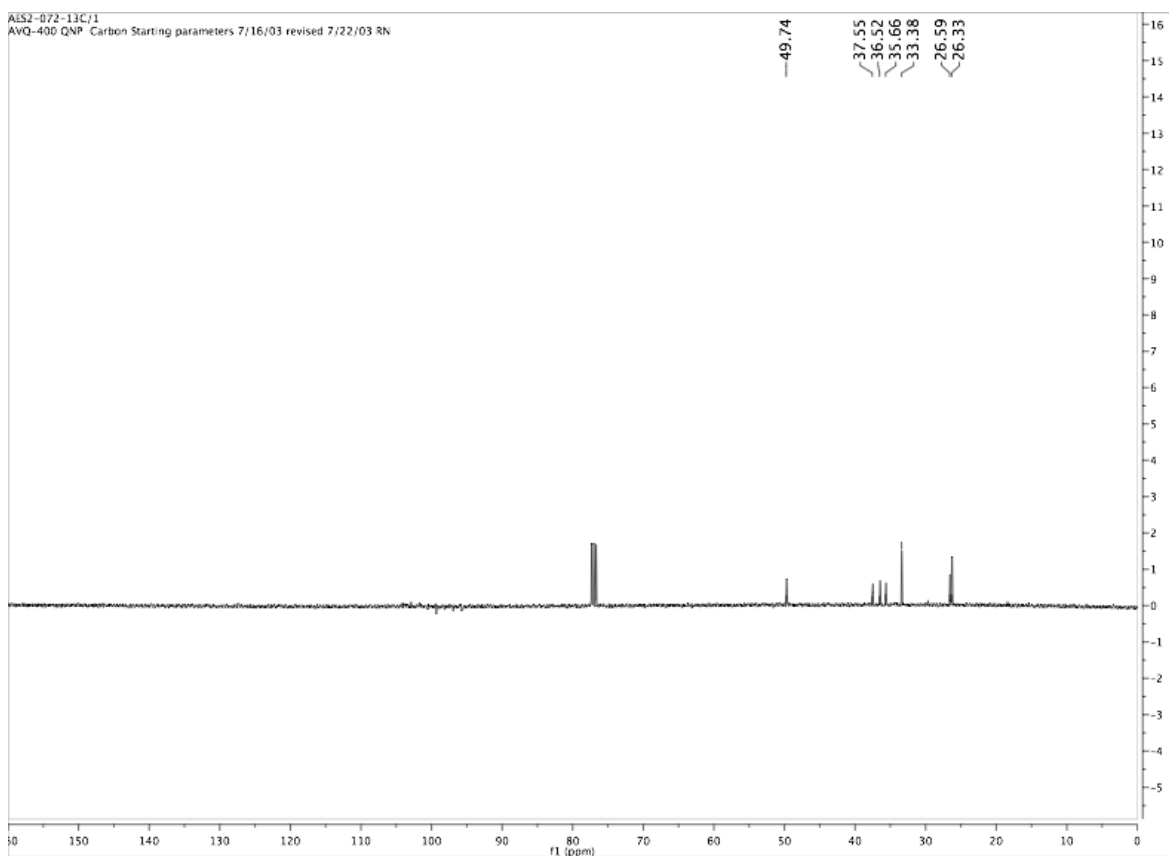

*N*-methyl(2-phenyl)propylamine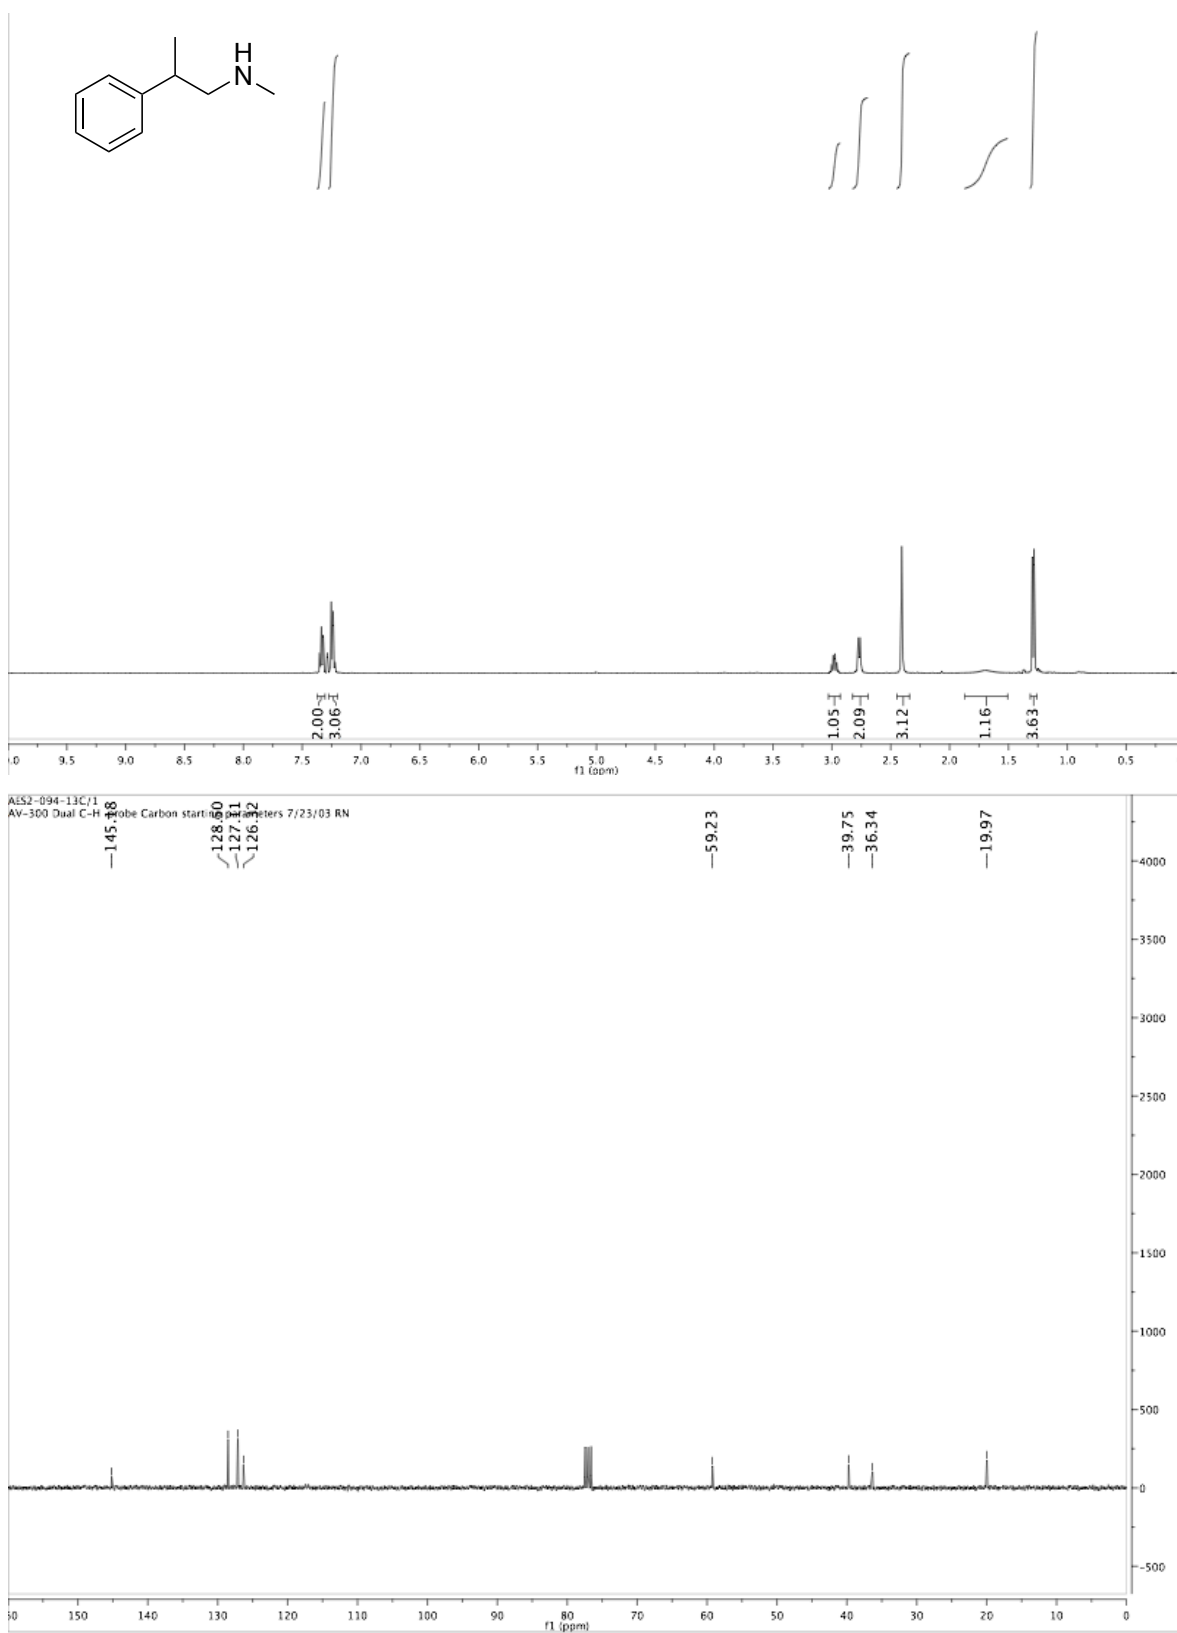

## 1-octylamine

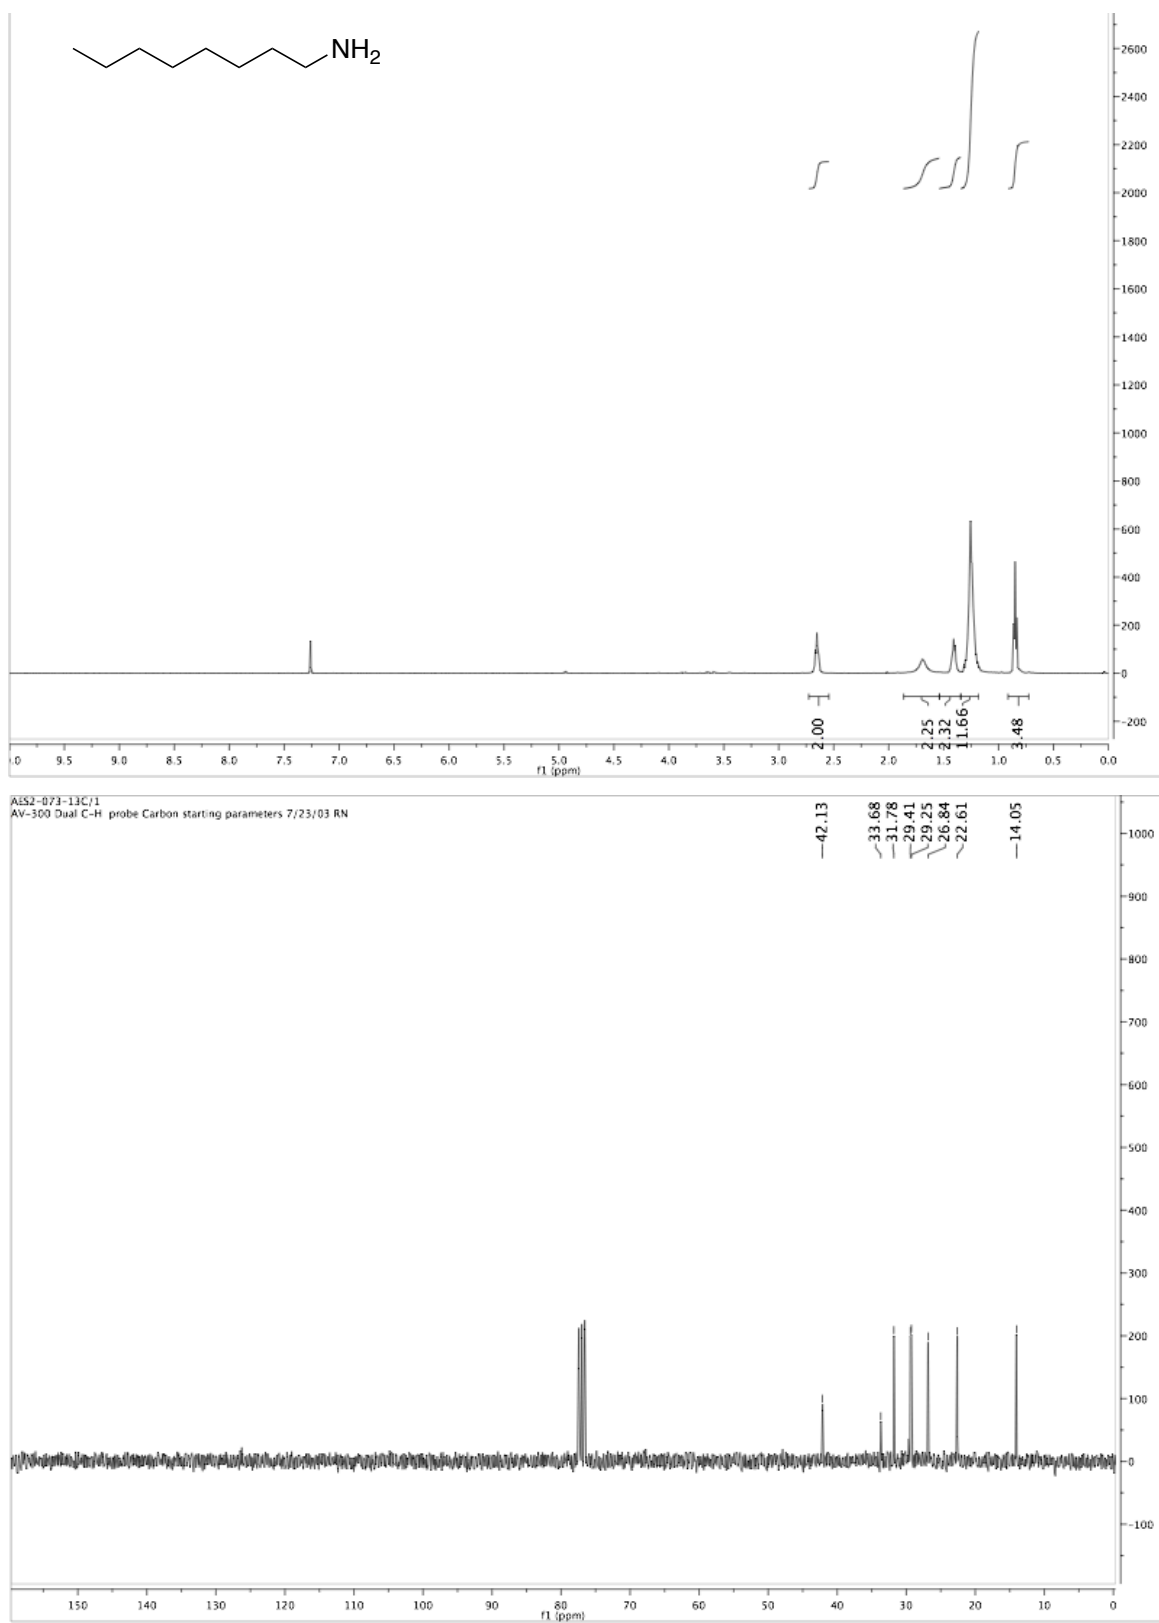

## (2-phenyl)propylamine

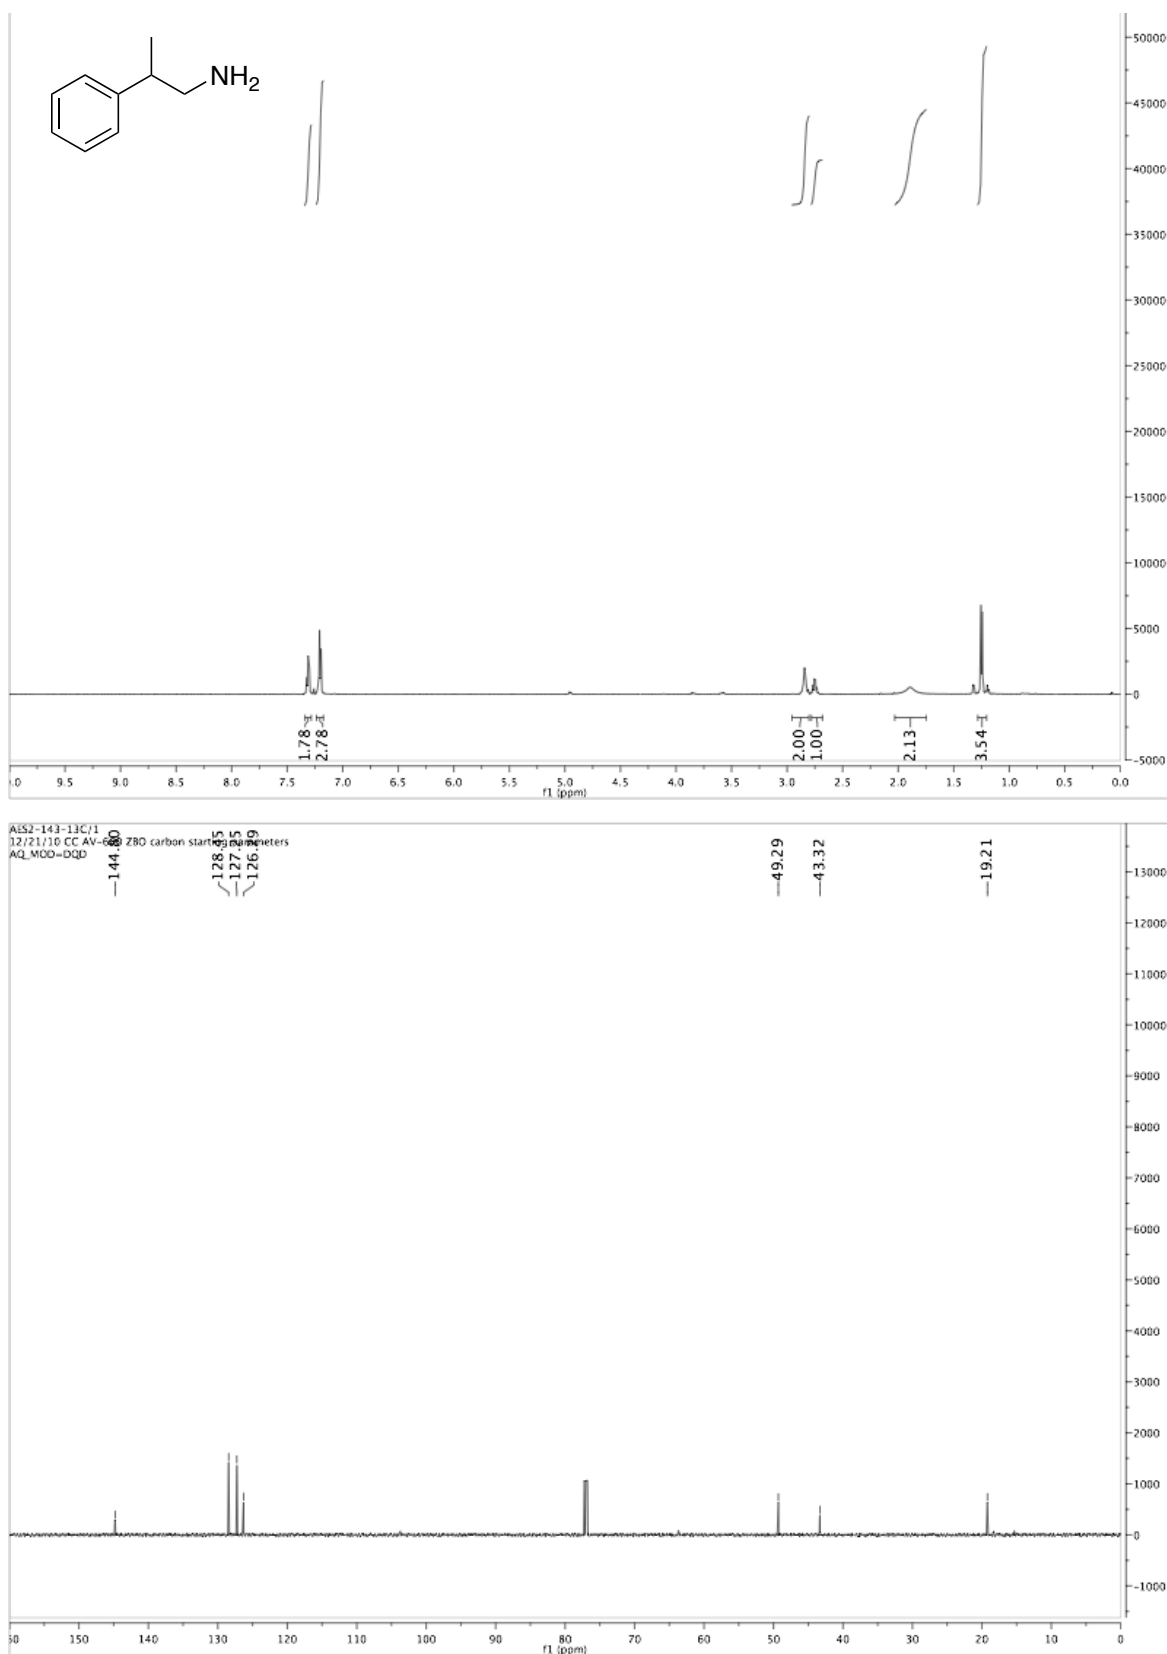

*N*-methyl-*exo*-2-norbornylamine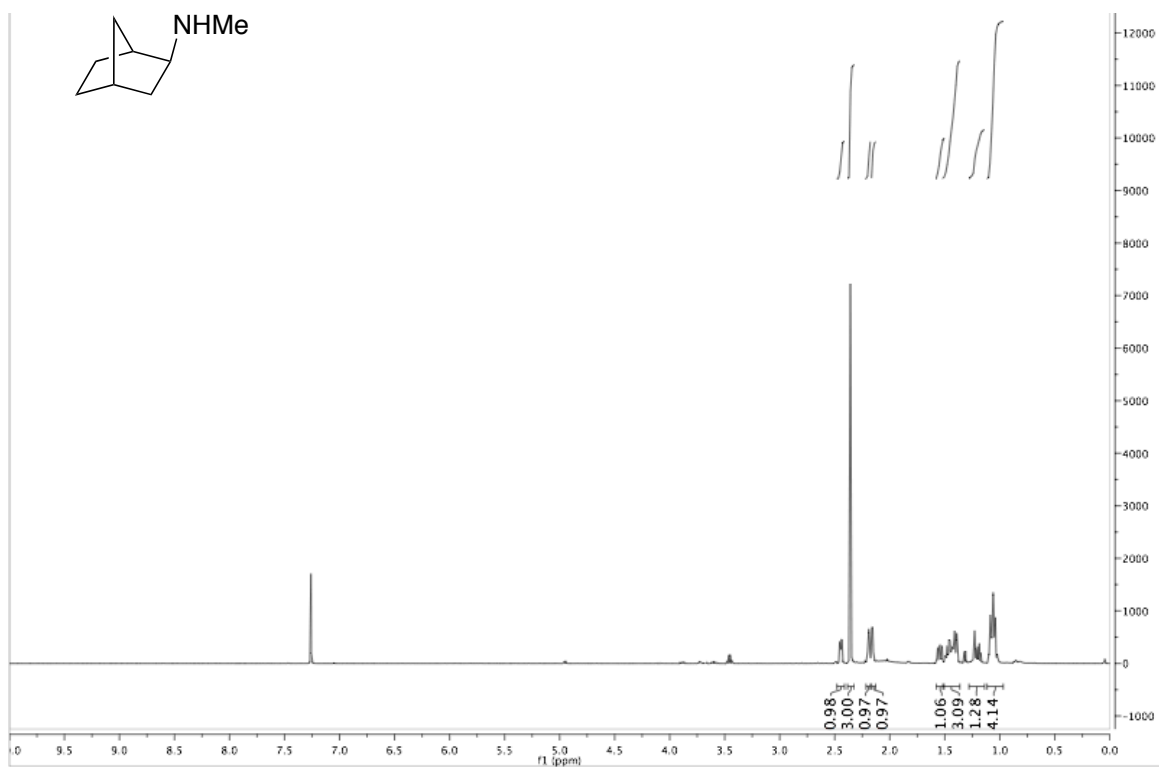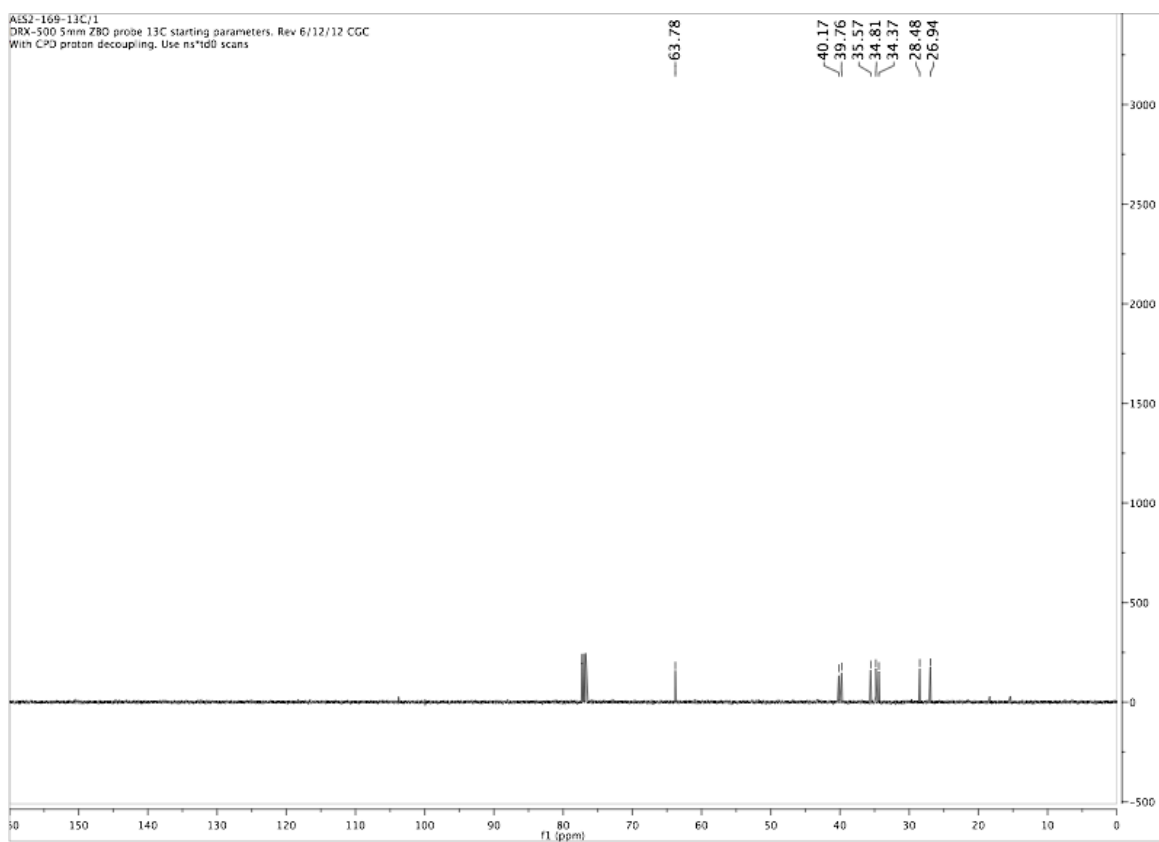

## 3,4-dimethoxy-N-methylphenethylamine

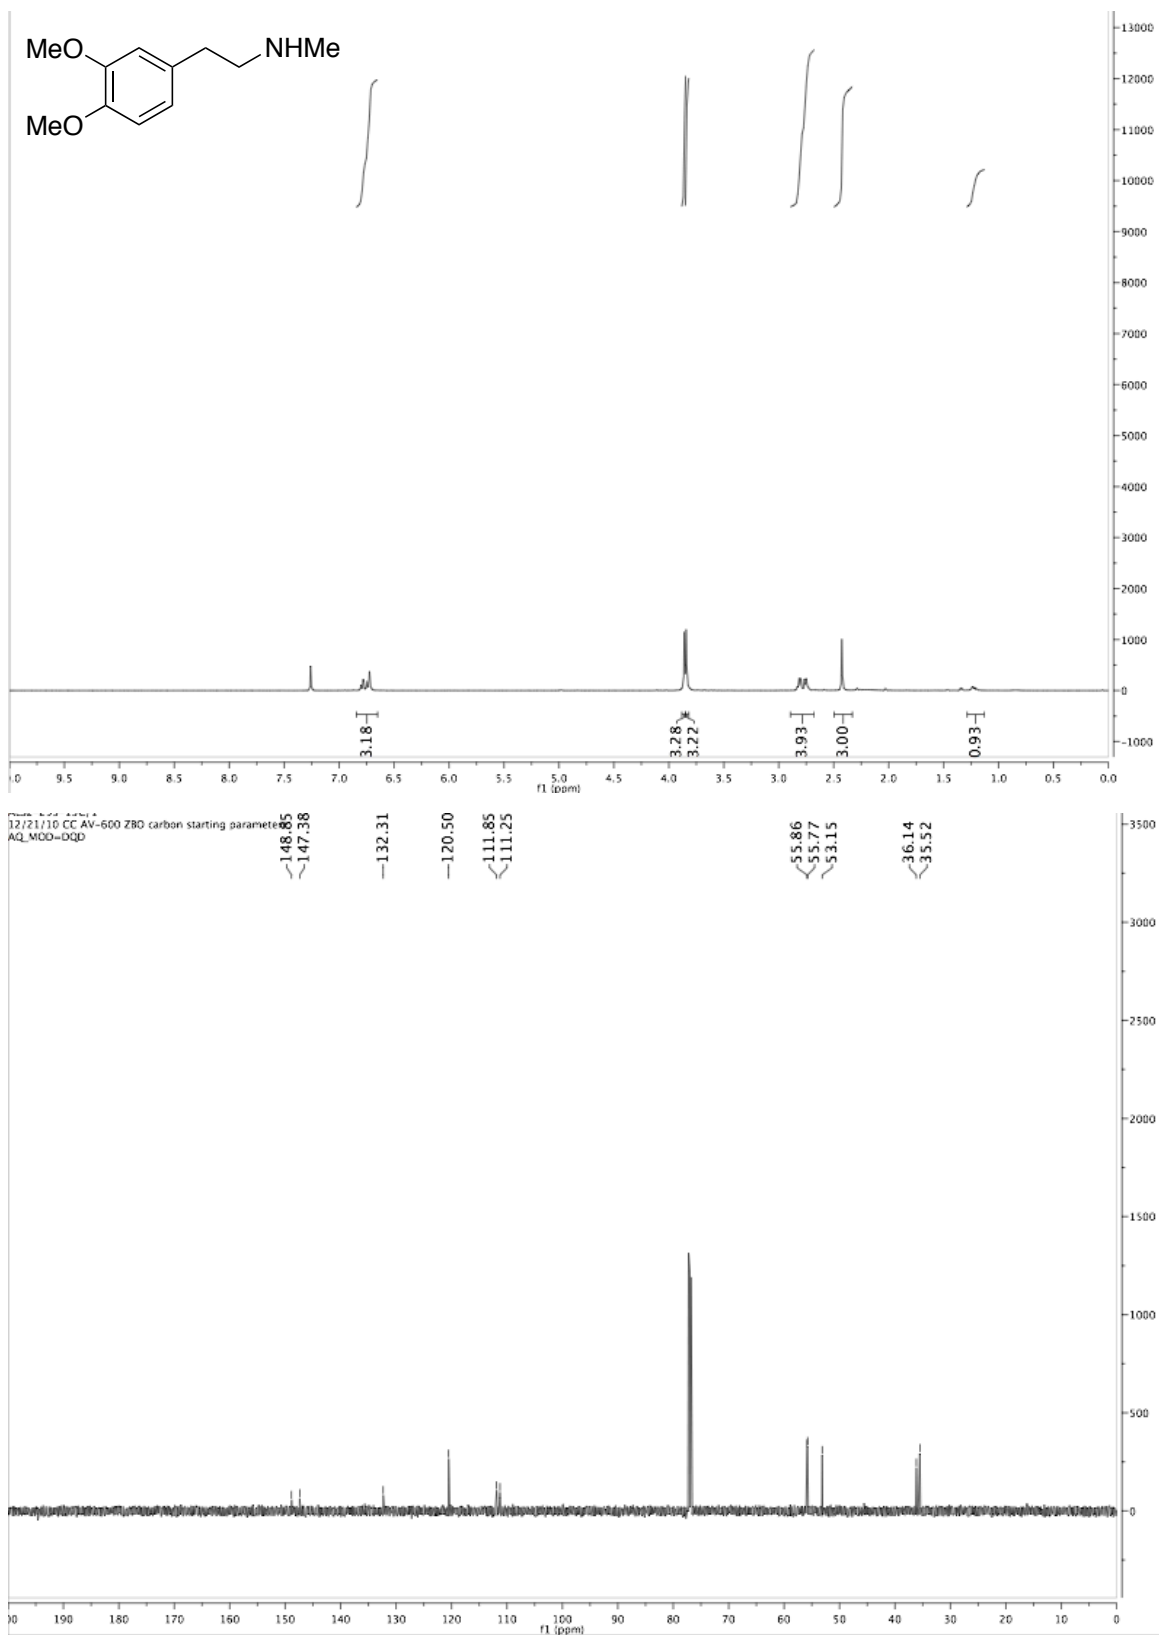

3-trifluoromethyl-*N*-methylphenethylamine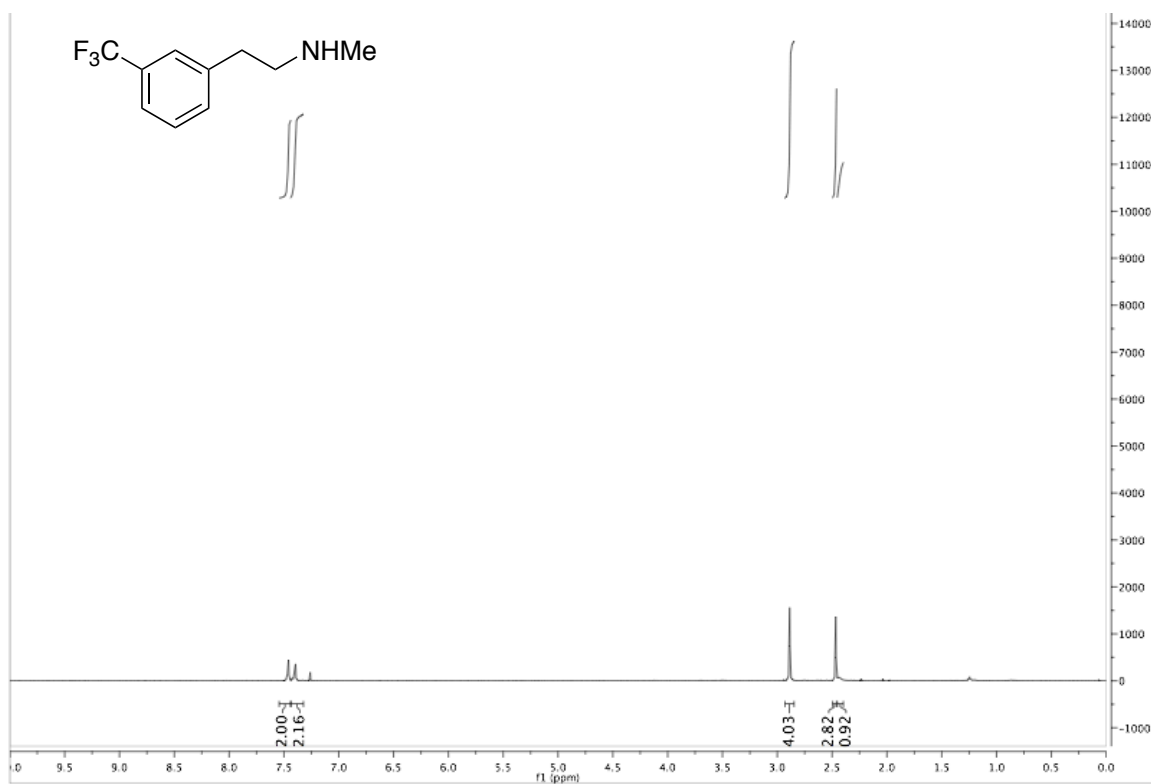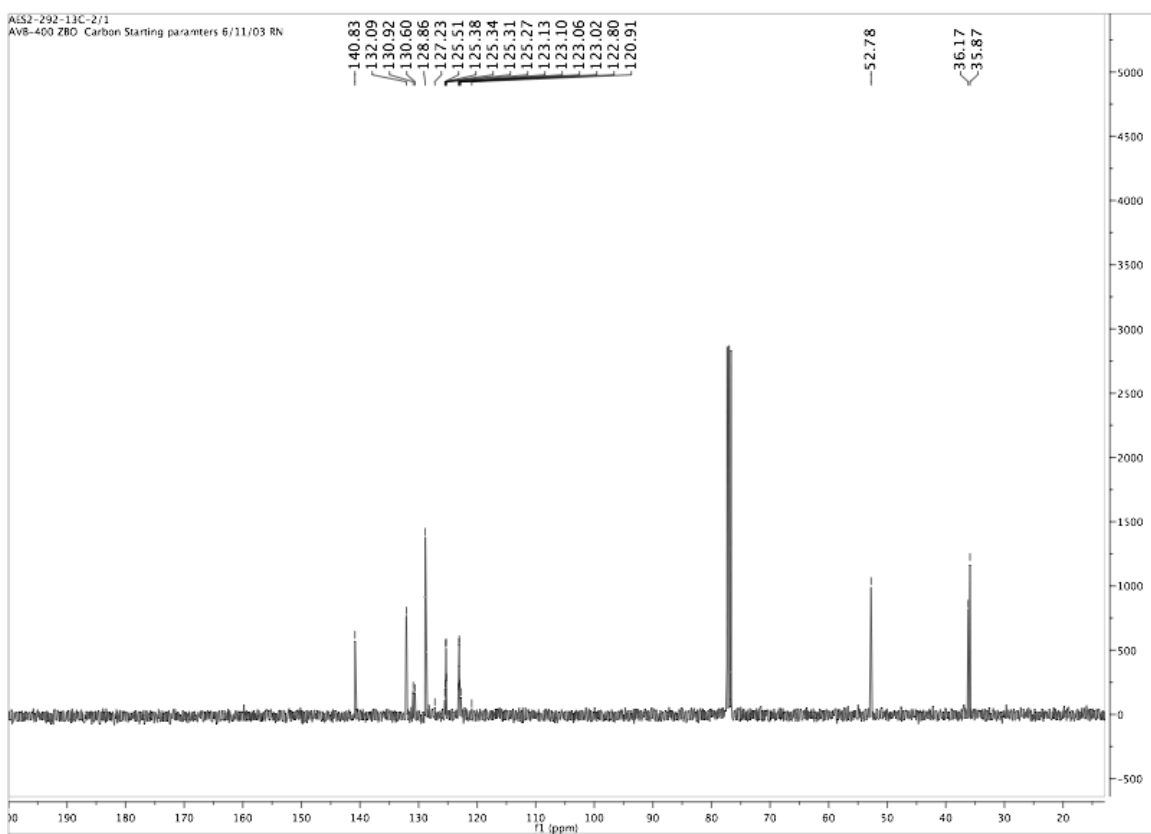

## (2-cyclohexyl)ethylamine

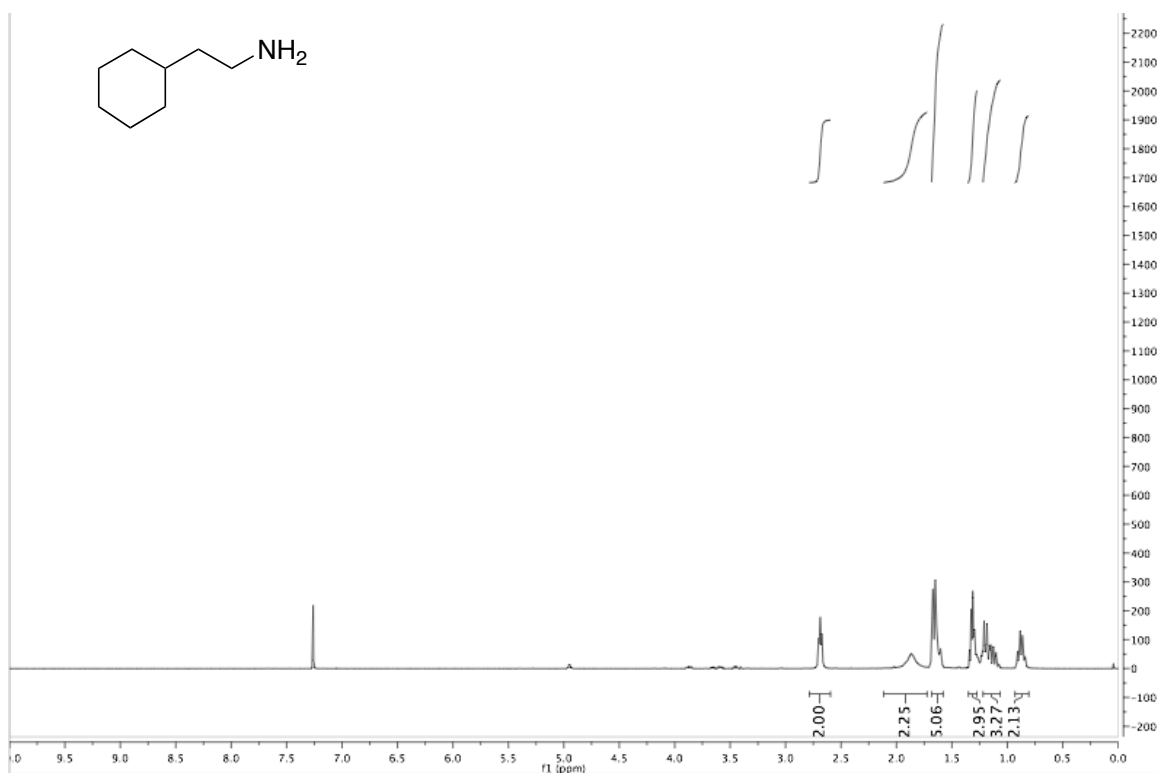

AES2-075-11C/1  
AV-300 Dual C-H probe Carbon starting parameters 7/23/03 RN

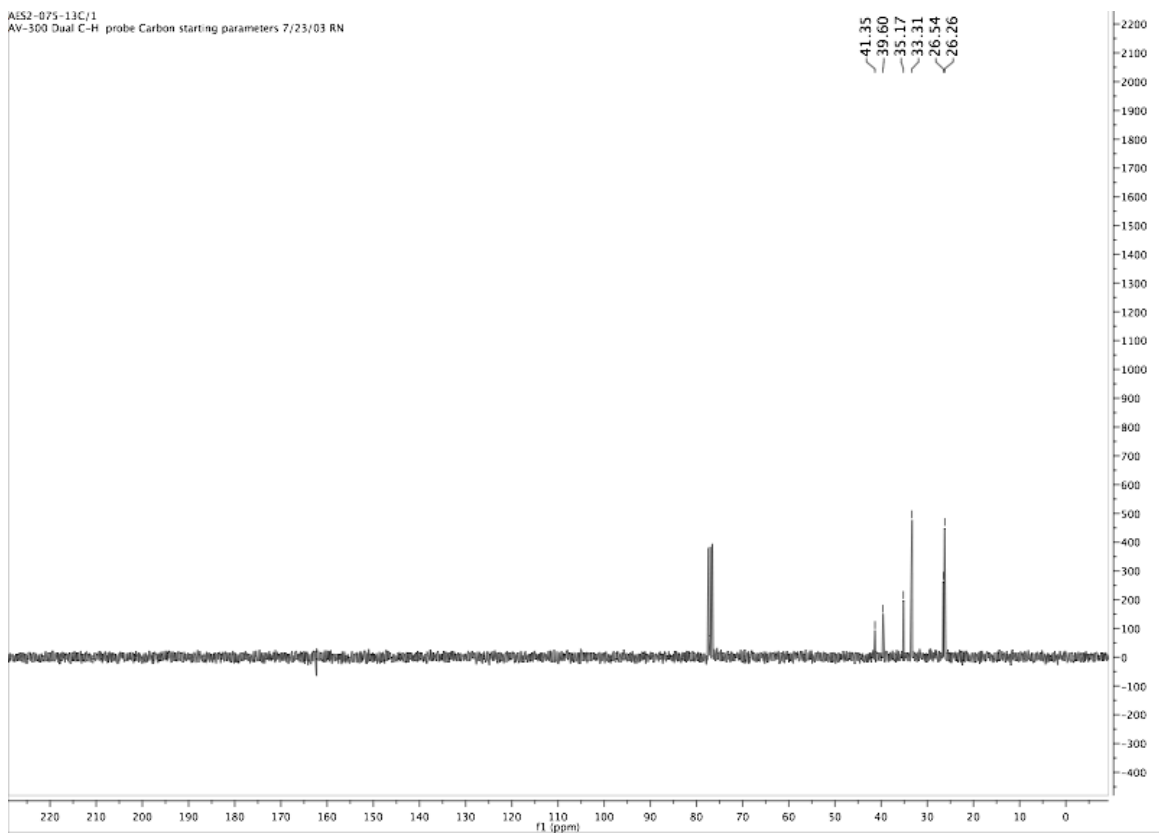



*N*,2-dimethyloctan-1-amine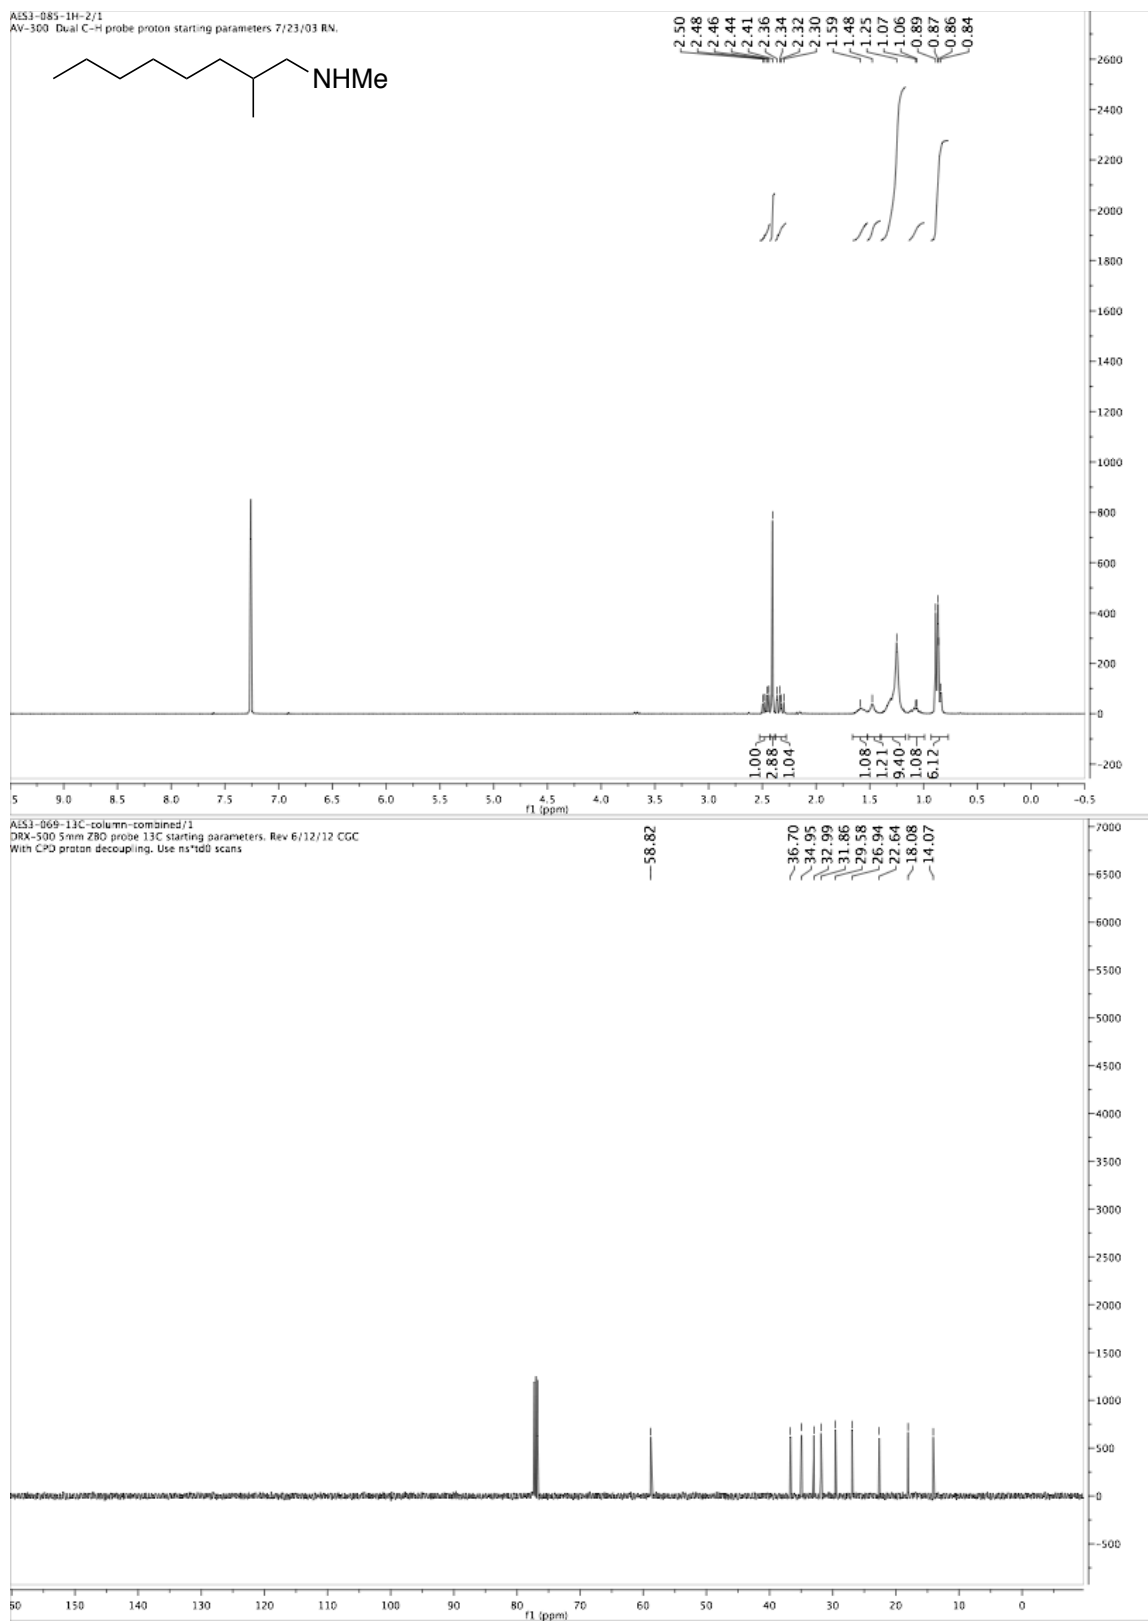

*N*-heptyloctan-1-amine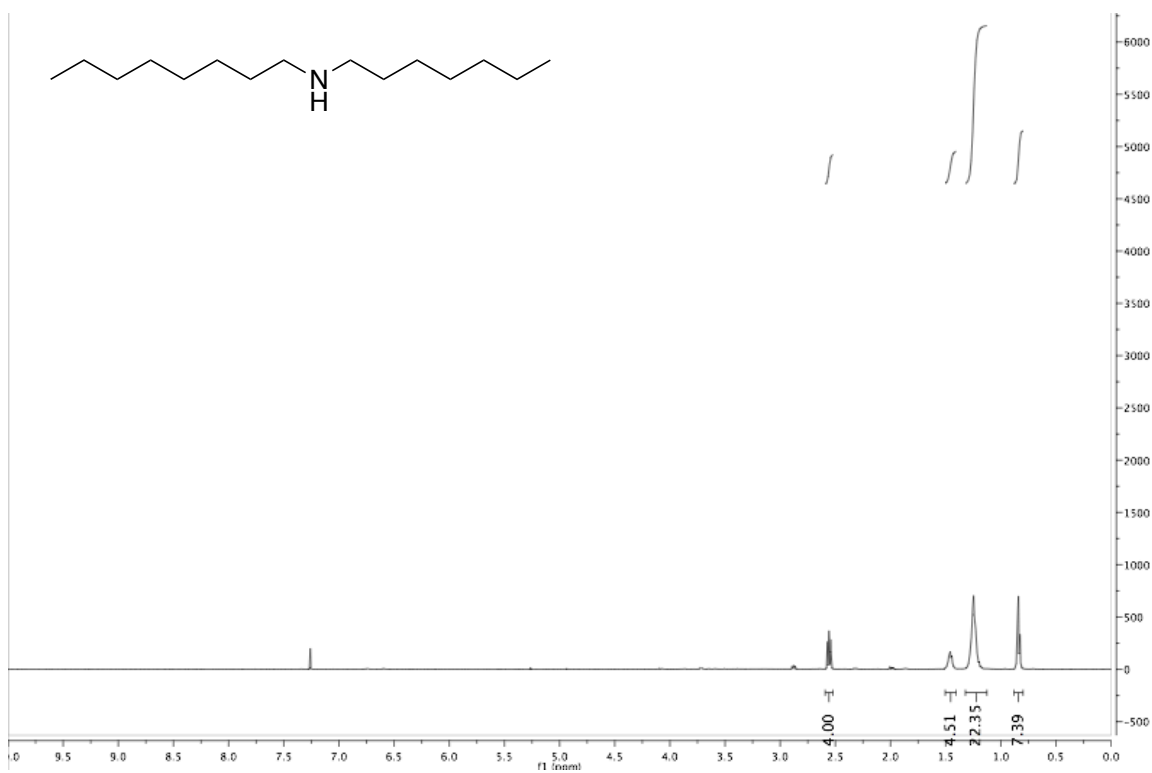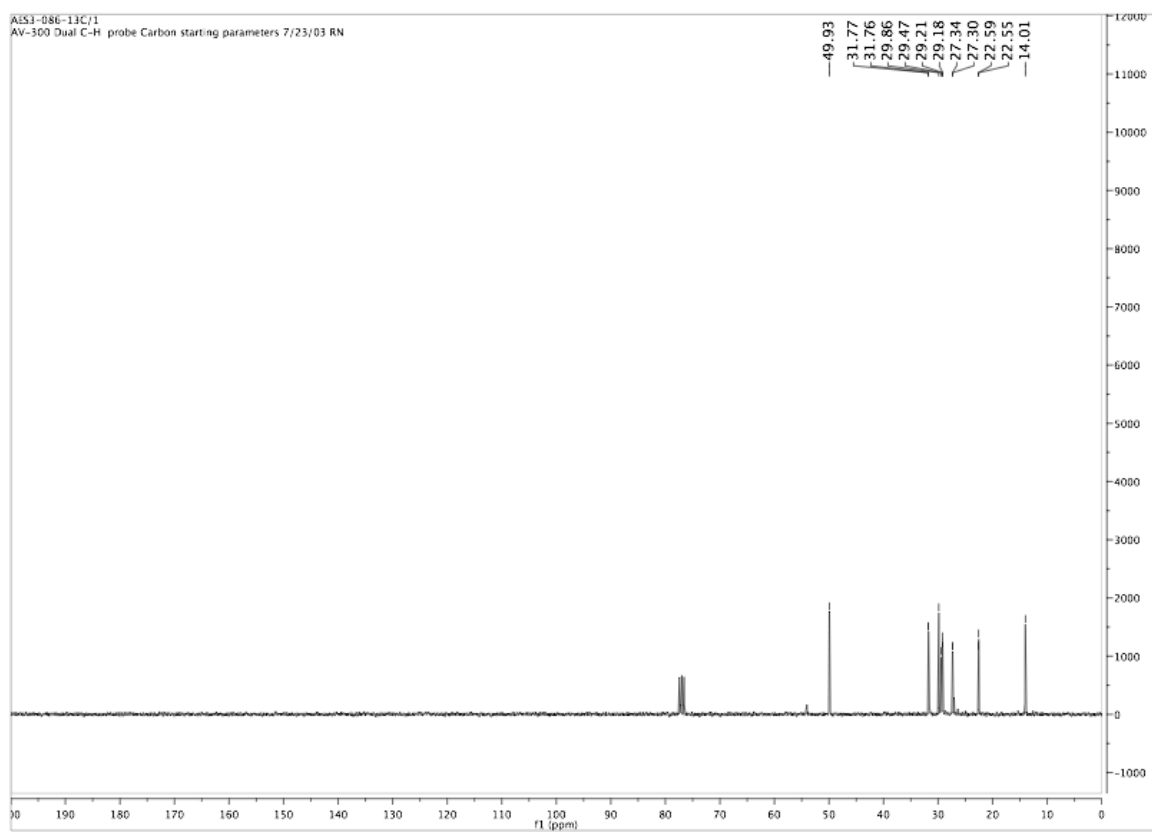

Supplement: NIHMS513607-supplement-1_si_001.pdf [file NIHMS513607-supplement-1_si_001.pdf]
